# Supplementary material for: Cytotoxic and Antibacterial Prenylated Acylphloroglucinols from Hypericum olympicum L.
Source: MDPI journal article supplement (doi:10.3390/plants12071500), 2023-03-29
Supplement: s1 [file plants-2313642-supplementary.pdf › plants-2313642-supplementary.pdf]

## Content

|                                                                                                                                                                                                                                           |    |
|-------------------------------------------------------------------------------------------------------------------------------------------------------------------------------------------------------------------------------------------|----|
| Figure S1. HRESIMS spectrum of compound 1. ....                                                                                                                                                                                           | 2  |
| Figure S2. MS/MS spectrum of the deprotonated molecule [M-H] <sup>-</sup> of compound 1. ....                                                                                                                                             | 2  |
| Figure S3. <sup>1</sup> H-NMR spectrum of compound 1. ....                                                                                                                                                                                | 3  |
| Figure S4. <sup>13</sup> C-NMR spectrum of compound 1. ....                                                                                                                                                                               | 3  |
| Figure S5. <sup>1</sup> H- <sup>1</sup> H COSY experiment of compound 1. ....                                                                                                                                                             | 4  |
| Figure S6. HSQC experiment of compound 1. ....                                                                                                                                                                                            | 4  |
| Figure S7. HMBC experiment of compound 1. ....                                                                                                                                                                                            | 5  |
| Figure S8. NOESY experiment of compound 1. ....                                                                                                                                                                                           | 5  |
| Figure S9. HRESIMS spectrum of compound 4. ....                                                                                                                                                                                           | 6  |
| Figure S10. MS/MS spectrum of the protonated molecule [M+H] <sup>+</sup> of compound 4. ....                                                                                                                                              | 6  |
| Figure S11. <sup>1</sup> H-NMR spectrum of compound 4. ....                                                                                                                                                                               | 7  |
| Figure S12. <sup>13</sup> C-NMR spectrum of compound 4. ....                                                                                                                                                                              | 7  |
| Figure S13. <sup>1</sup> H- <sup>1</sup> H COSY experiment of compound 4. ....                                                                                                                                                            | 8  |
| Figure S14. HSQC experiment of compound 4. ....                                                                                                                                                                                           | 8  |
| Figure S15. HMBC experiment of compound 4. ....                                                                                                                                                                                           | 9  |
| Figure S16. NOESY experiment of compound 4. ....                                                                                                                                                                                          | 9  |
| Figure S17. HRESIMS spectrum of compound 4a. ....                                                                                                                                                                                         | 10 |
| Figure S18. MS/MS spectrum of the protonated molecule [M+H] <sup>+</sup> of compound 4a. ....                                                                                                                                             | 10 |
| Figure S19. <sup>1</sup> H-NMR spectrum of compound 4a. ....                                                                                                                                                                              | 11 |
| Figure S20. <sup>13</sup> C-NMR spectrum of compound 4a. ....                                                                                                                                                                             | 11 |
| Figure S21. <sup>1</sup> H- <sup>1</sup> H COSY experiment of compound 4a. ....                                                                                                                                                           | 12 |
| Figure S22. HSQC experiment of compound 4a. ....                                                                                                                                                                                          | 12 |
| Figure S23. HMBC experiment of compound 4a. ....                                                                                                                                                                                          | 13 |
| Figure S24. NOESY experiment of compound 4a. ....                                                                                                                                                                                         | 13 |
| Figure S25. HRESIMS spectrum of compound 4b. ....                                                                                                                                                                                         | 14 |
| Figure S26. MS/MS spectrum of the protonated molecule [M+H] <sup>+</sup> of compound 4b. ....                                                                                                                                             | 14 |
| Figure S27. <sup>1</sup> H-NMR spectrum of compound 4b. ....                                                                                                                                                                              | 15 |
| Figure S28. <sup>13</sup> C-NMR spectrum of compound 4b. ....                                                                                                                                                                             | 15 |
| Figure S29. <sup>1</sup> H- <sup>1</sup> H COSY experiment of compound 4a. ....                                                                                                                                                           | 16 |
| Figure S30. HSQC experiment of compound 4b. ....                                                                                                                                                                                          | 16 |
| Figure S31. HMBC experiment of compound 4b. ....                                                                                                                                                                                          | 17 |
| Figure S32. NOESY experiment of compound 4b. ....                                                                                                                                                                                         | 17 |
| Figure S33. HRESIMS spectrum of compound 5. ....                                                                                                                                                                                          | 18 |
| Figure S34. MS/MS spectrum of the protonated molecule [M+H] <sup>+</sup> of compound 5. ....                                                                                                                                              | 18 |
| Figure S35. <sup>1</sup> H-NMR spectrum of compound 5. ....                                                                                                                                                                               | 19 |
| Figure S36. <sup>13</sup> C-NMR spectrum of 5. ....                                                                                                                                                                                       | 19 |
| Figure S37. <sup>1</sup> H- <sup>1</sup> H COSY experiment of compound 5. ....                                                                                                                                                            | 20 |
| Figure S38. HSQC experiment of 5. ....                                                                                                                                                                                                    | 20 |
| Figure S39. HMBC experiment of compound 5. ....                                                                                                                                                                                           | 21 |
| Figure S40. NOESY experiment of compound 5. ....                                                                                                                                                                                          | 21 |
| Table S1. Absorbance at 550 nm of the MRSA biofilm died with Hucker crystal violet after exposure to the tested compounds. ....                                                                                                           | 22 |
| Table S2. One-way ANOVA of the metabolic activity of the tested strains after exposure to hyperpolyphyllirin/hyperibine J (3), olympiforin A (4) and olympiforin B (5). Comparison between the treated groups and untreated control. .... | 23 |

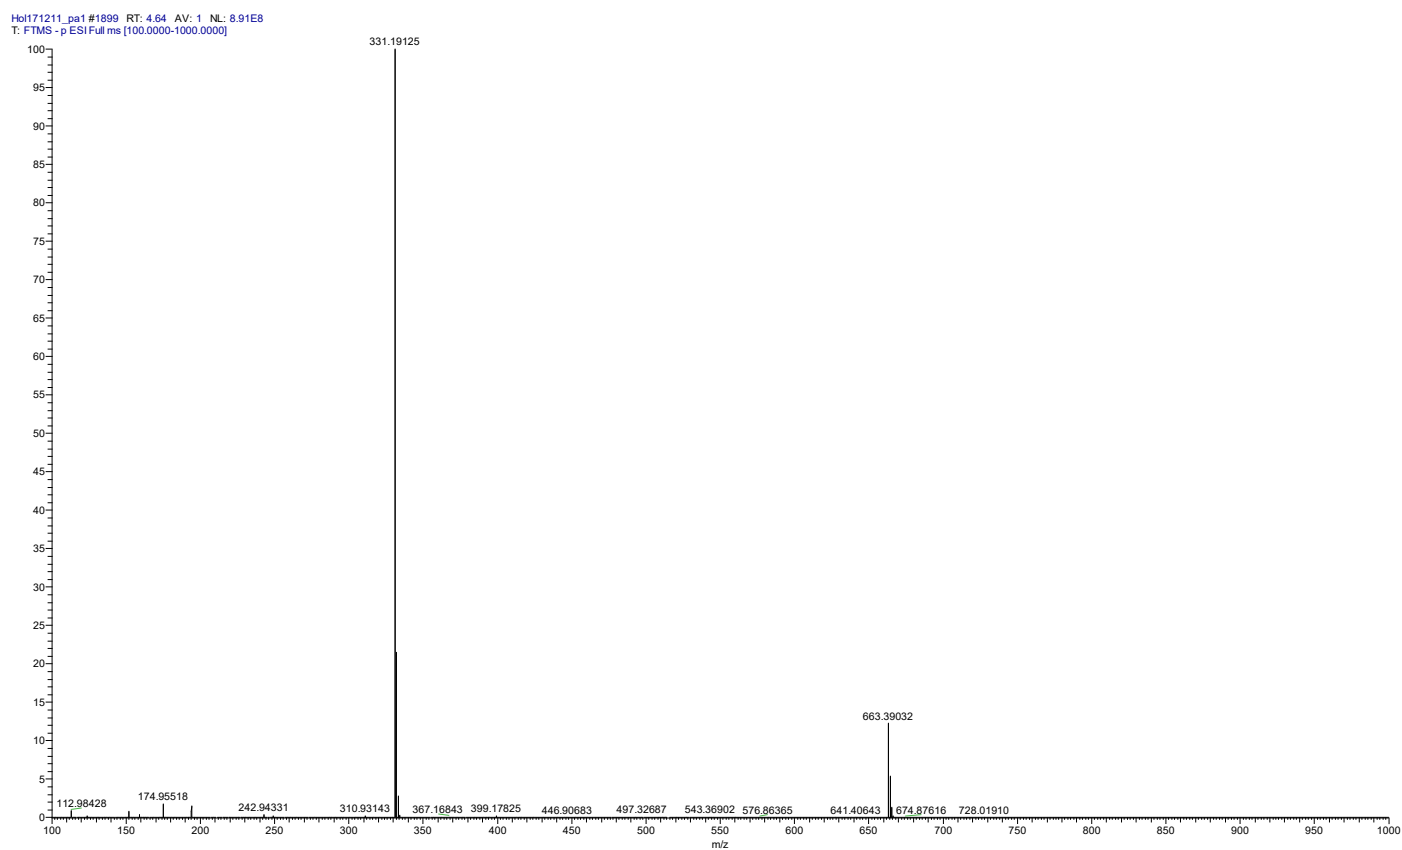

Figure S1. HRESIMS spectrum of compound **1**.

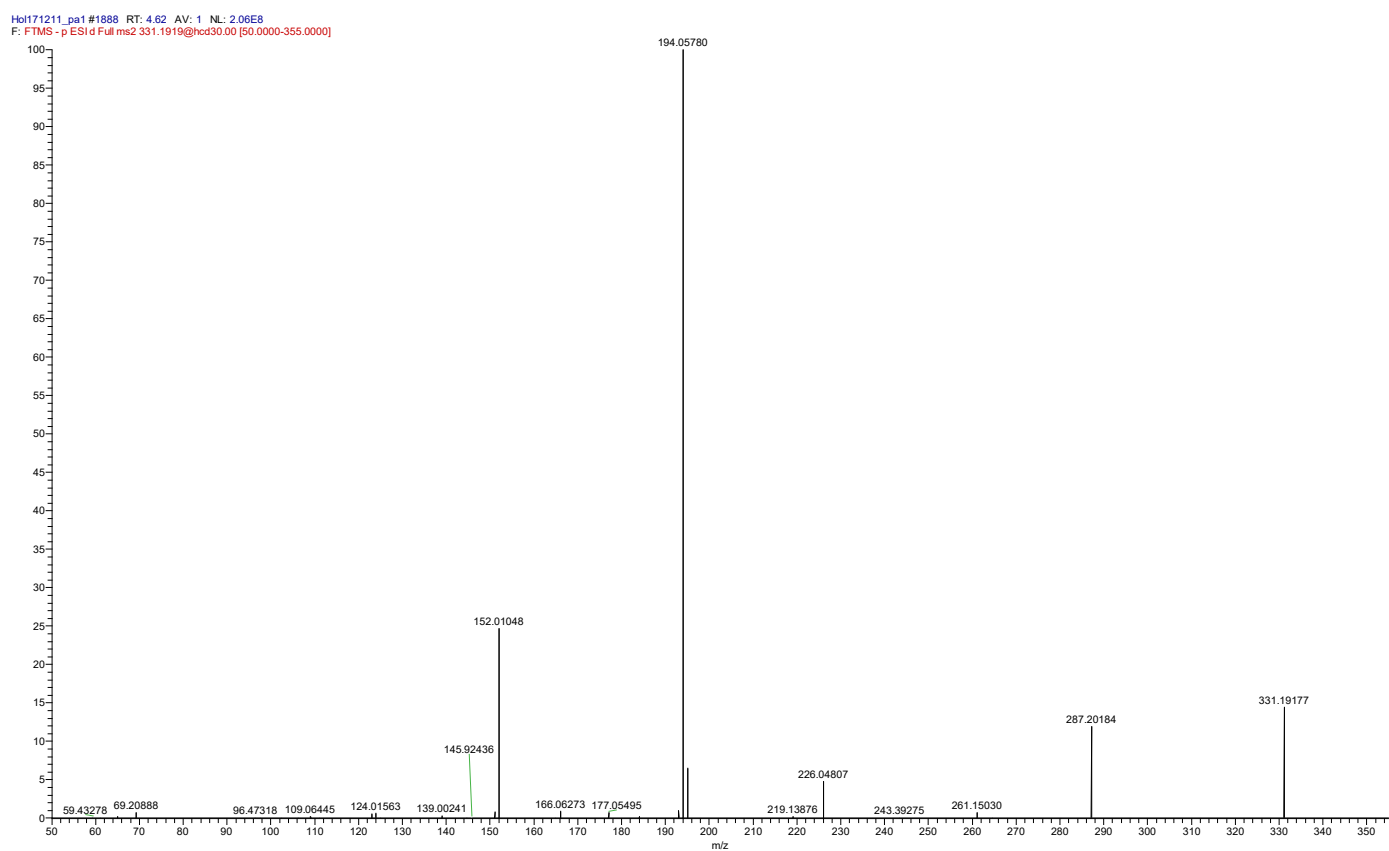

Figure S2. MS/MS spectrum of the deprotonated molecule  $[M-H]^-$  of compound **1**.

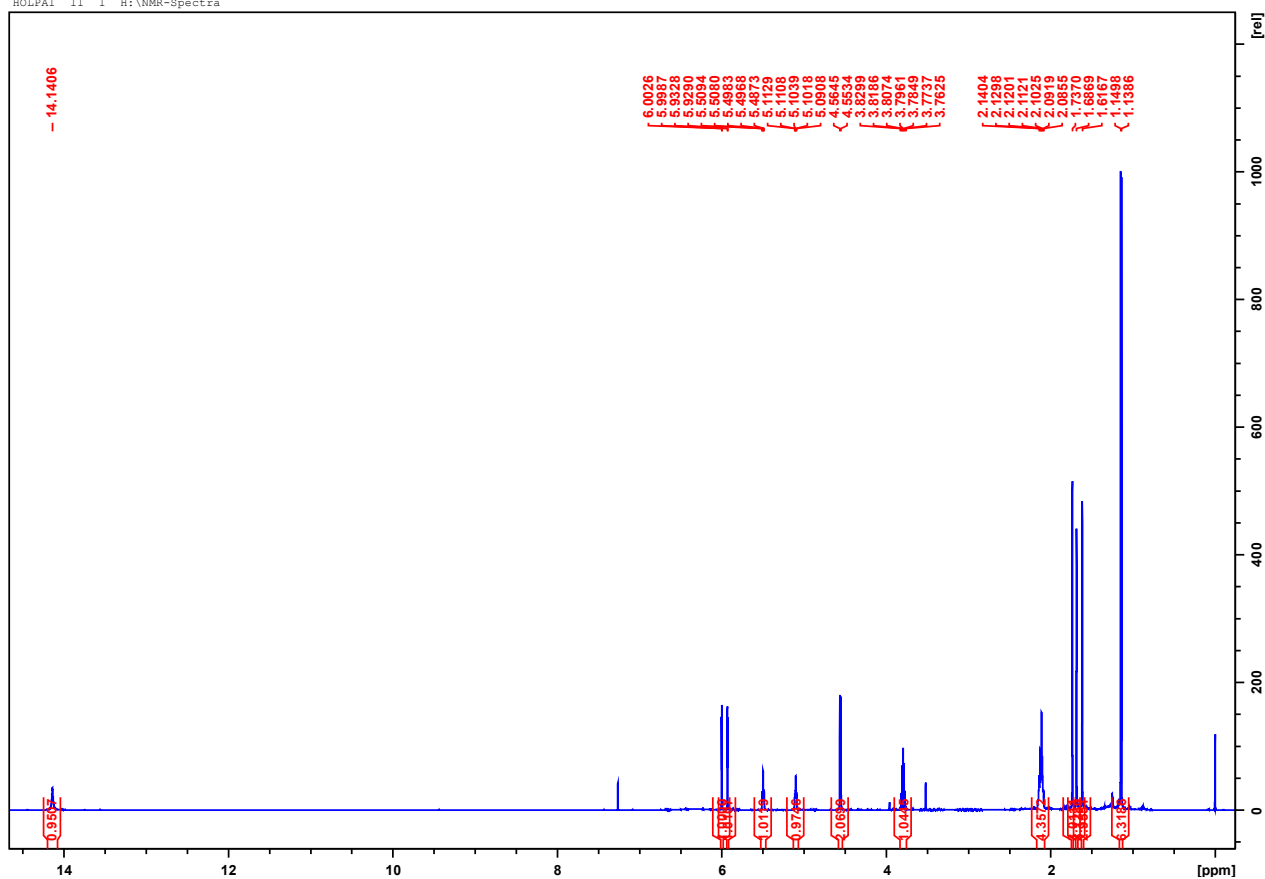

**Figure S3.**  $^1\text{H}$ -NMR spectrum of compound **1**.

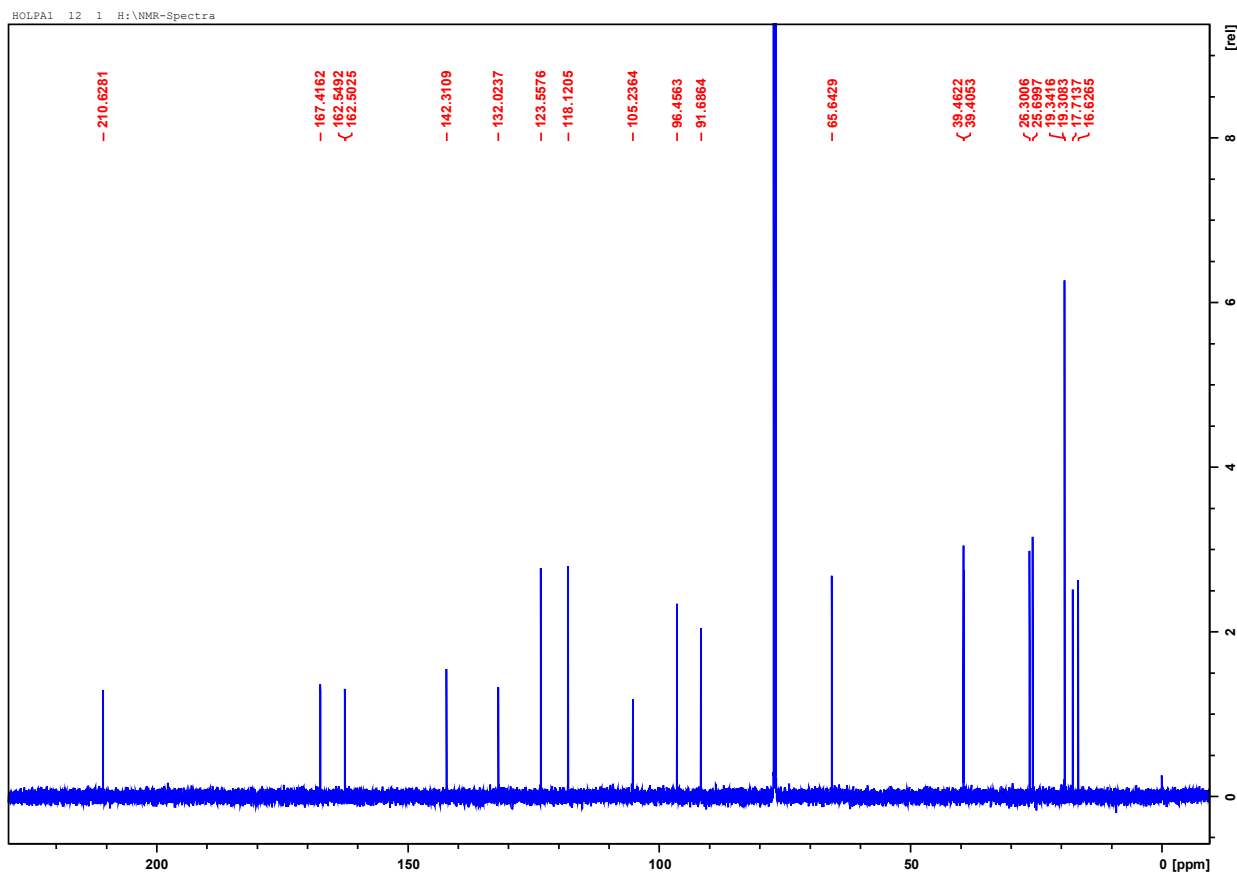

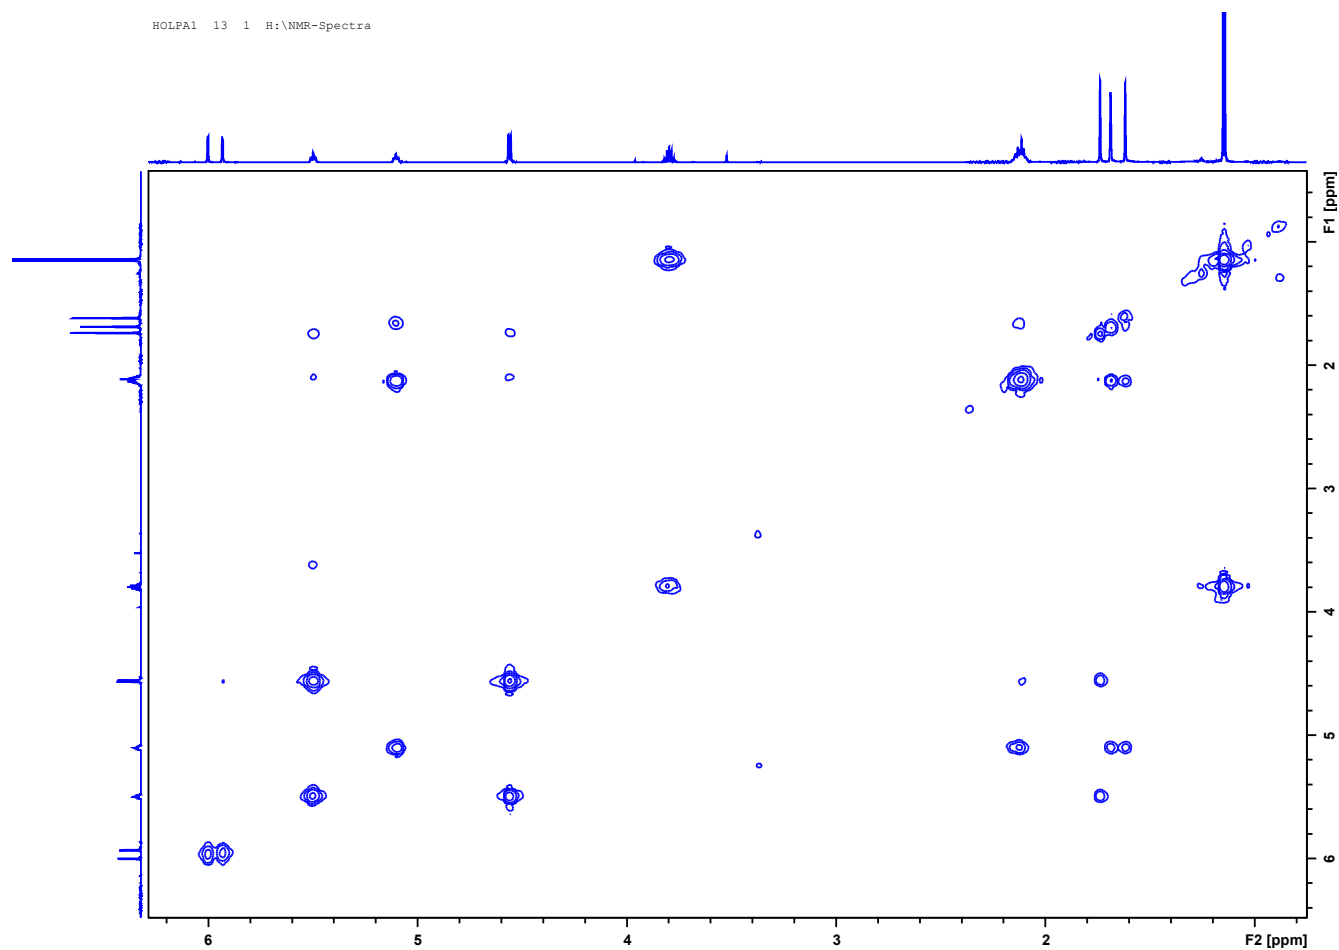Figure S5.  $^1\text{H}$ - $^1\text{H}$  COSY experiment of compound 1.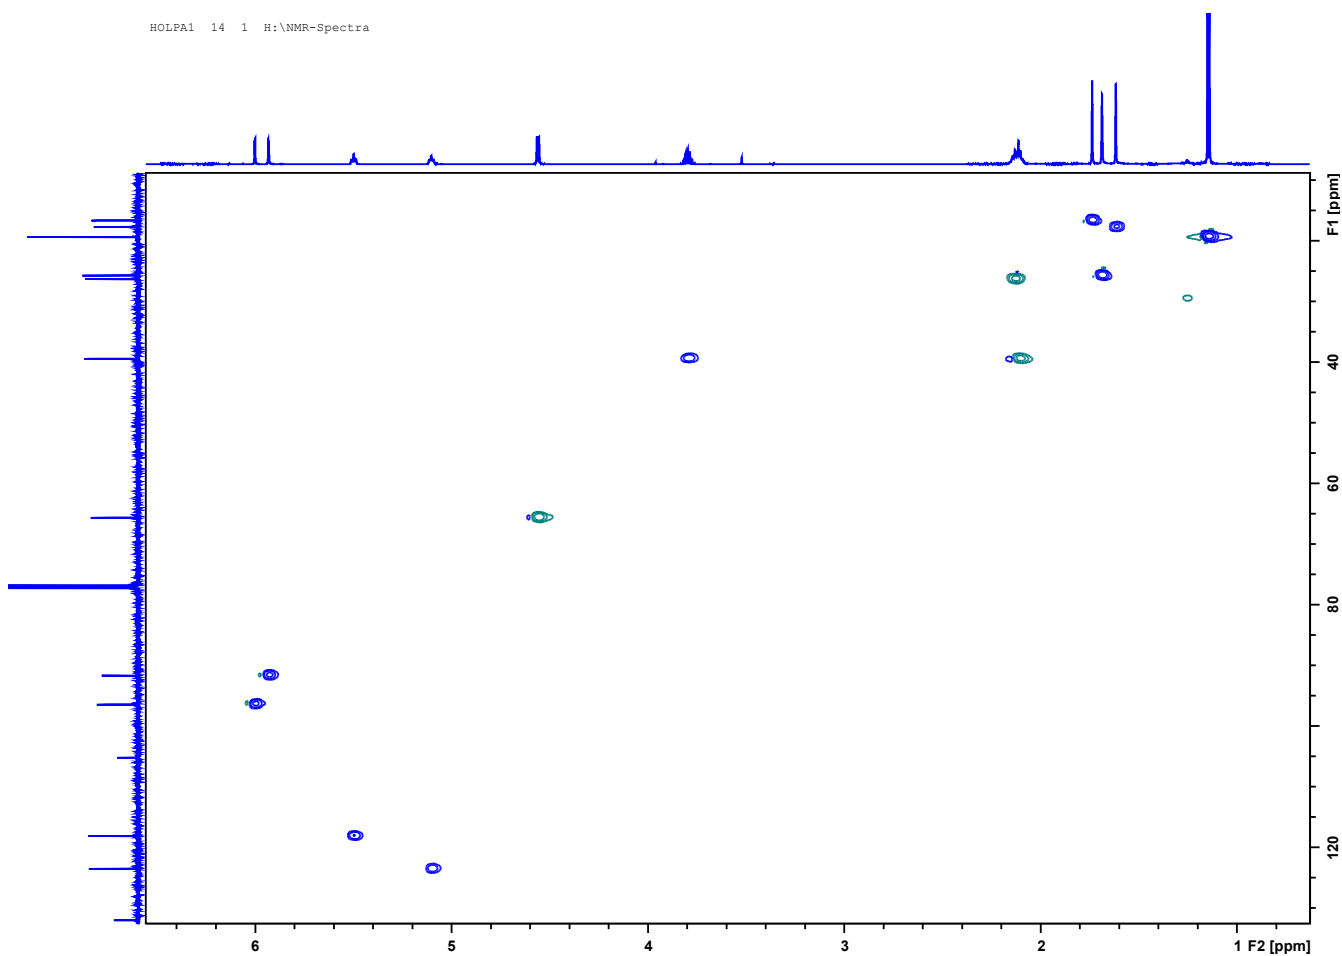

Figure S6. HSQC experiment of compound 1.

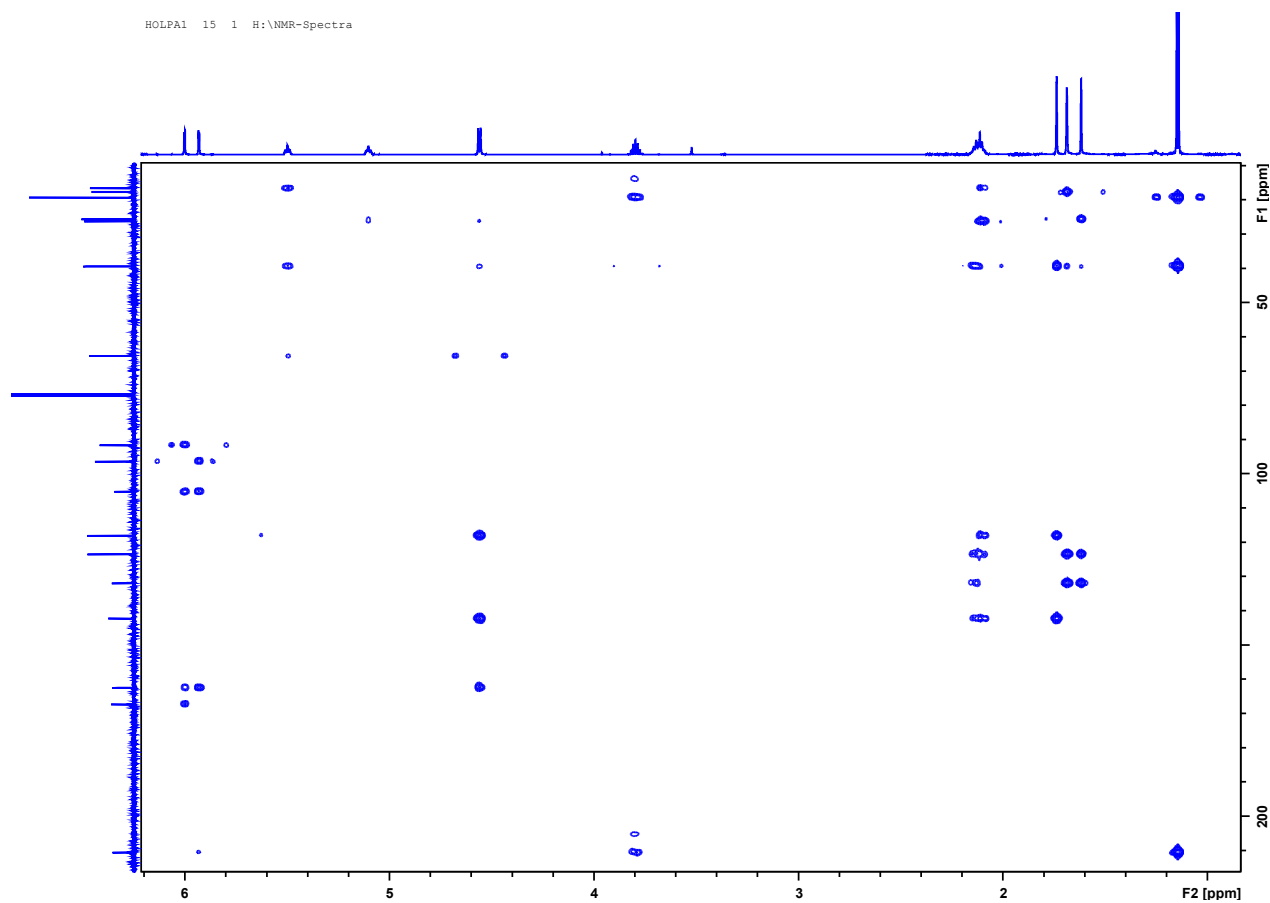

Figure S7. HMBC experiment of compound 1.

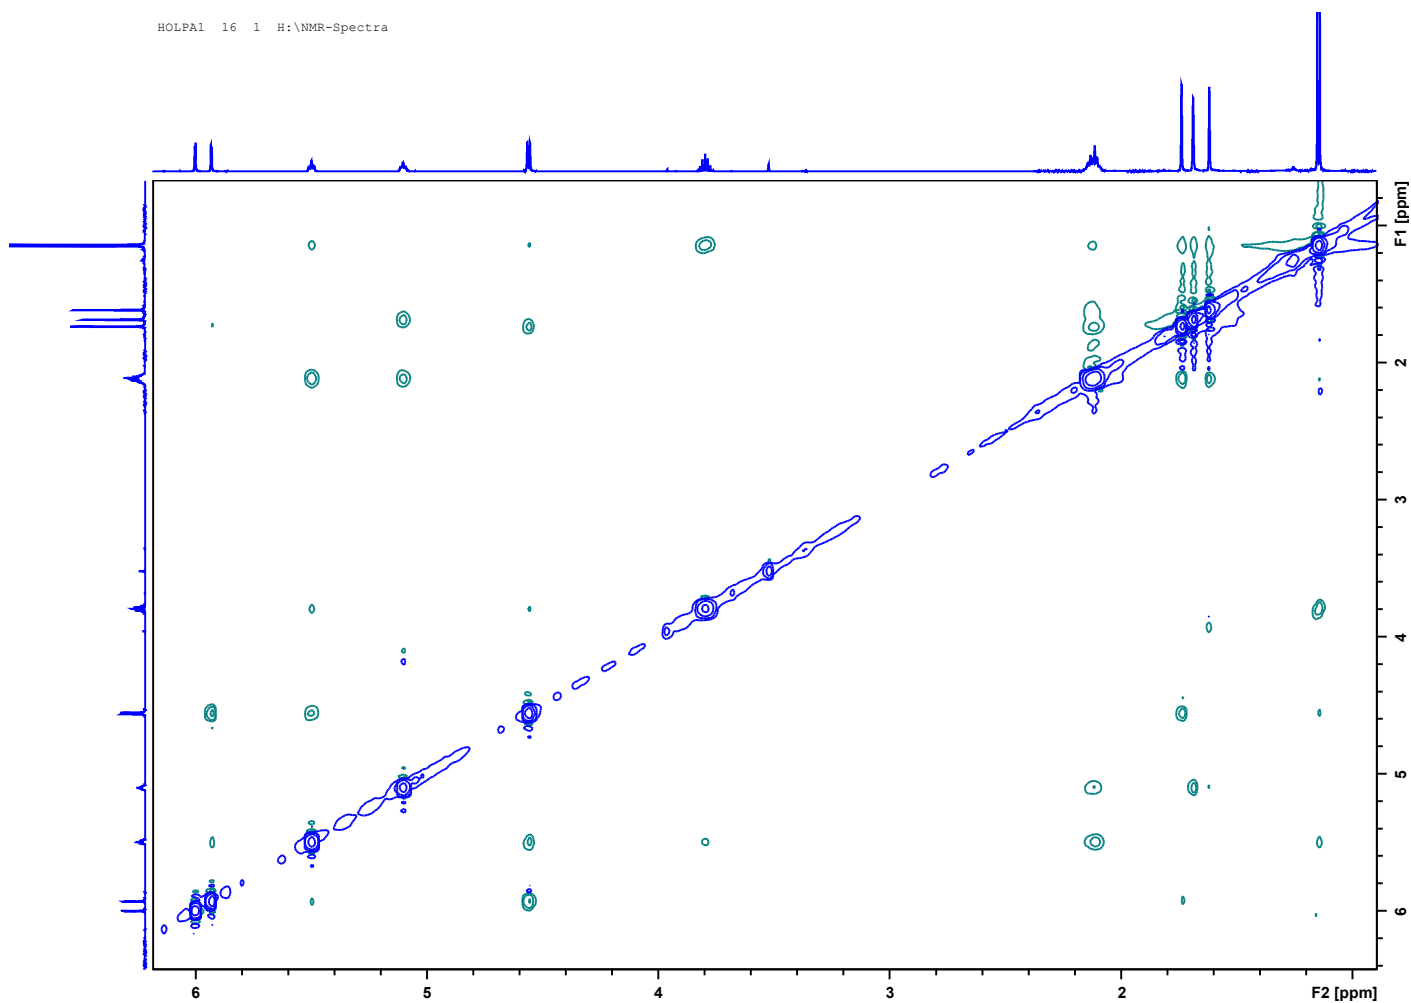

Figure S8. NOESY experiment of compound 1.

OlympiflorinA #4371 RT: 9.68 AV: 1 NL: 5.39E8  
T: FTMS + p ESI Full ms [100.0000-1000.0000]

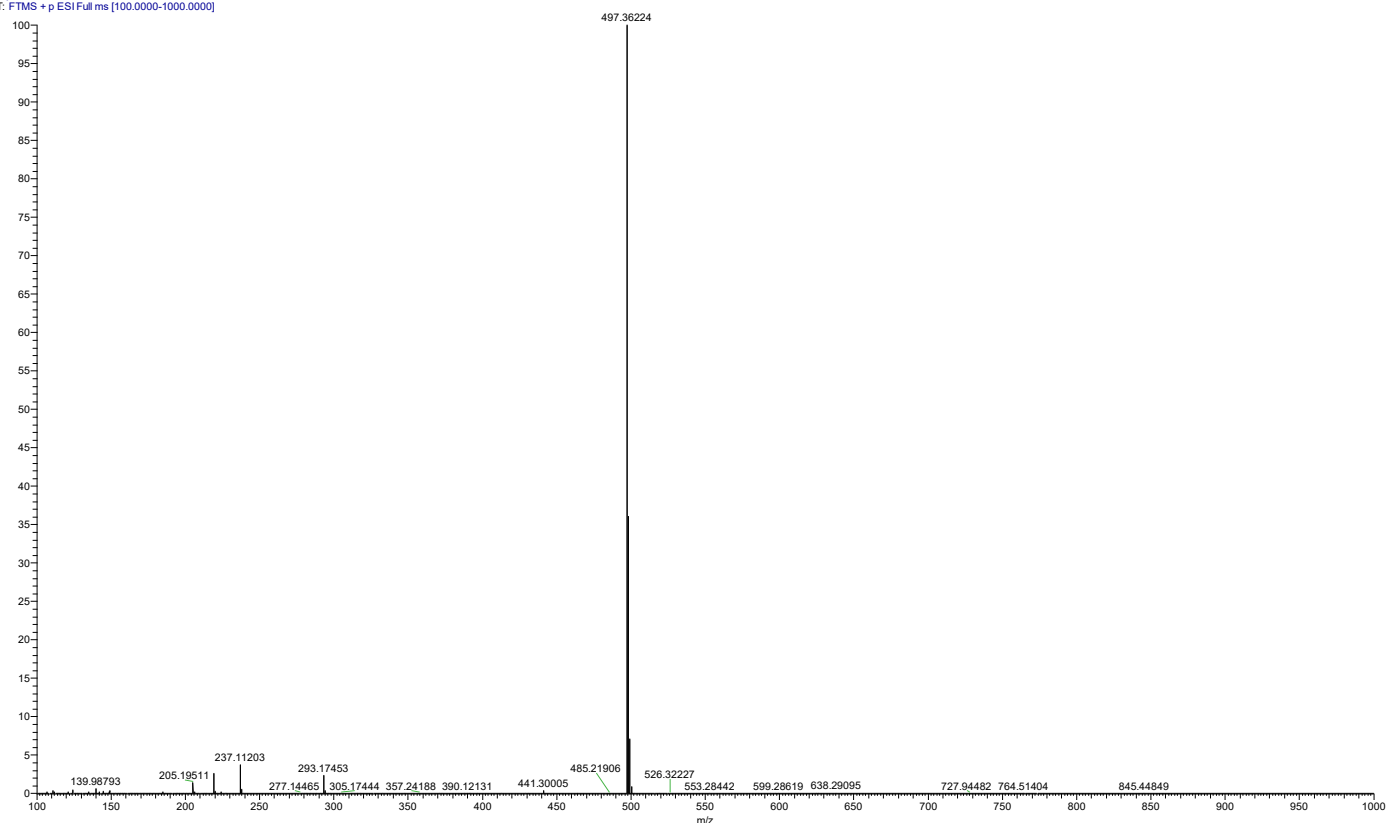

Figure S9. HRESIMS spectrum of compound 4.

OlympiflorinA #4390 RT: 9.73 AV: 1 NL: 3.92E7  
F: FTMS + p ESI d Full ms2 497.3626@nod30.00 [50.0000-525.0000]

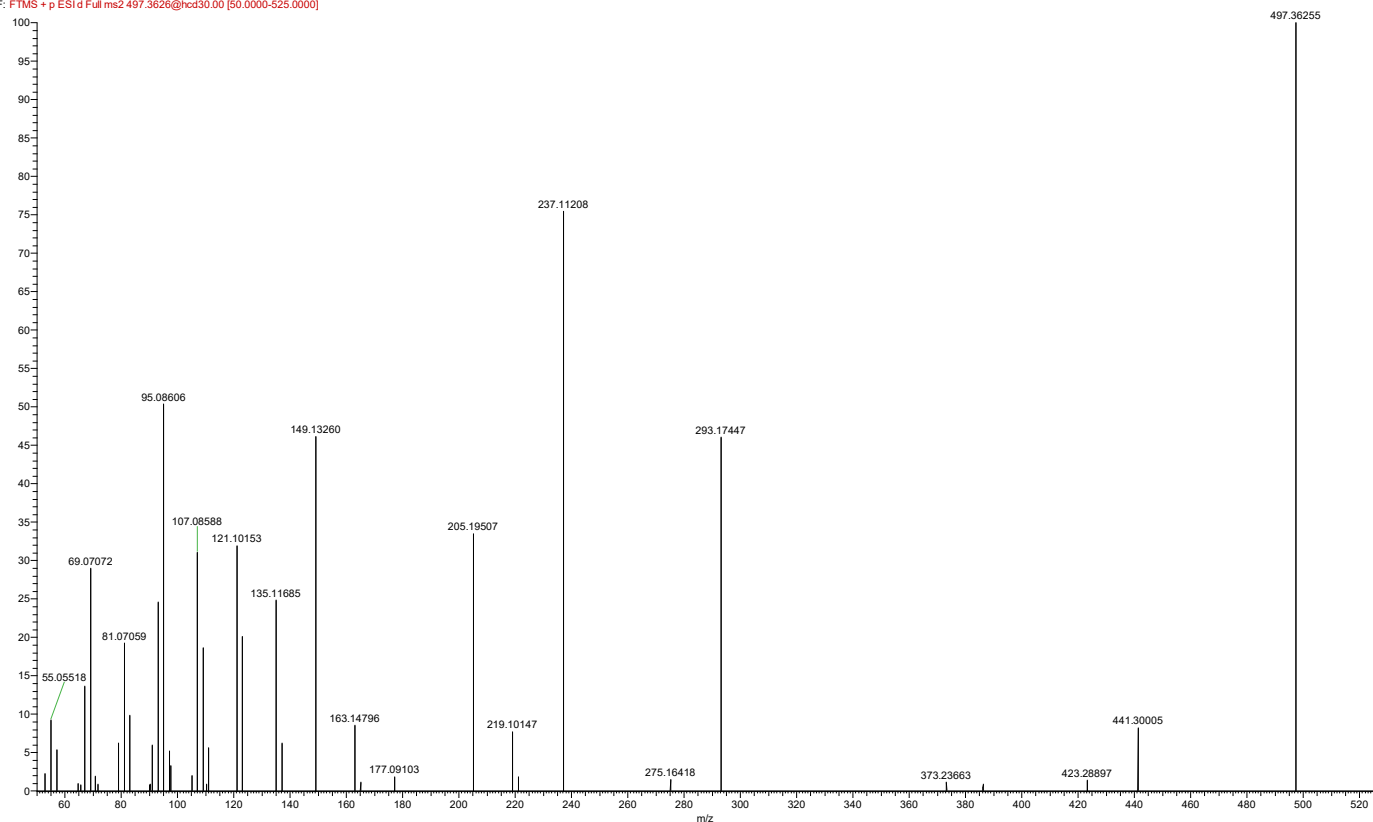

Figure S10. MS/MS spectrum of the protonated molecule  $[M+H]^+$  of compound 4.

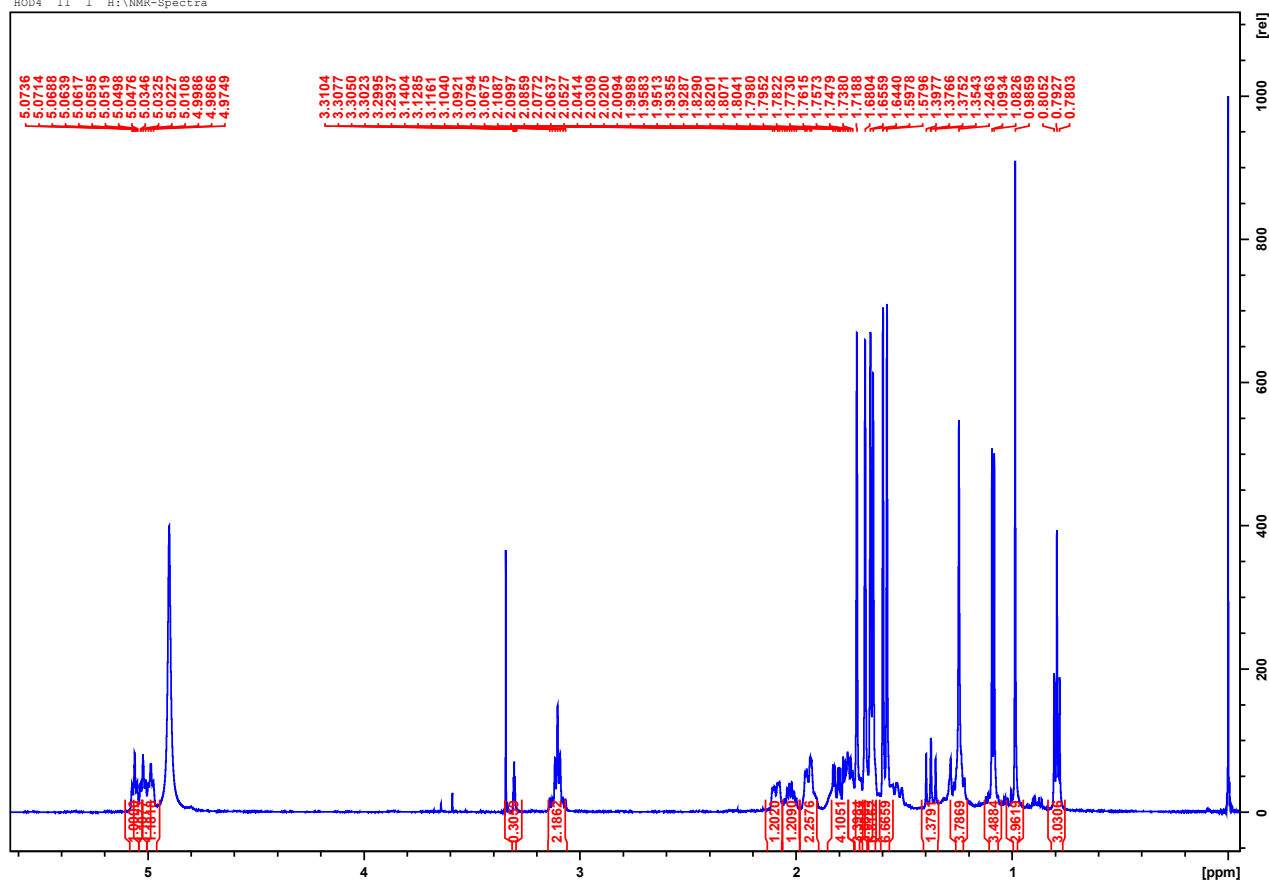Figure S11.  $^1\text{H}$ -NMR spectrum of compound 4.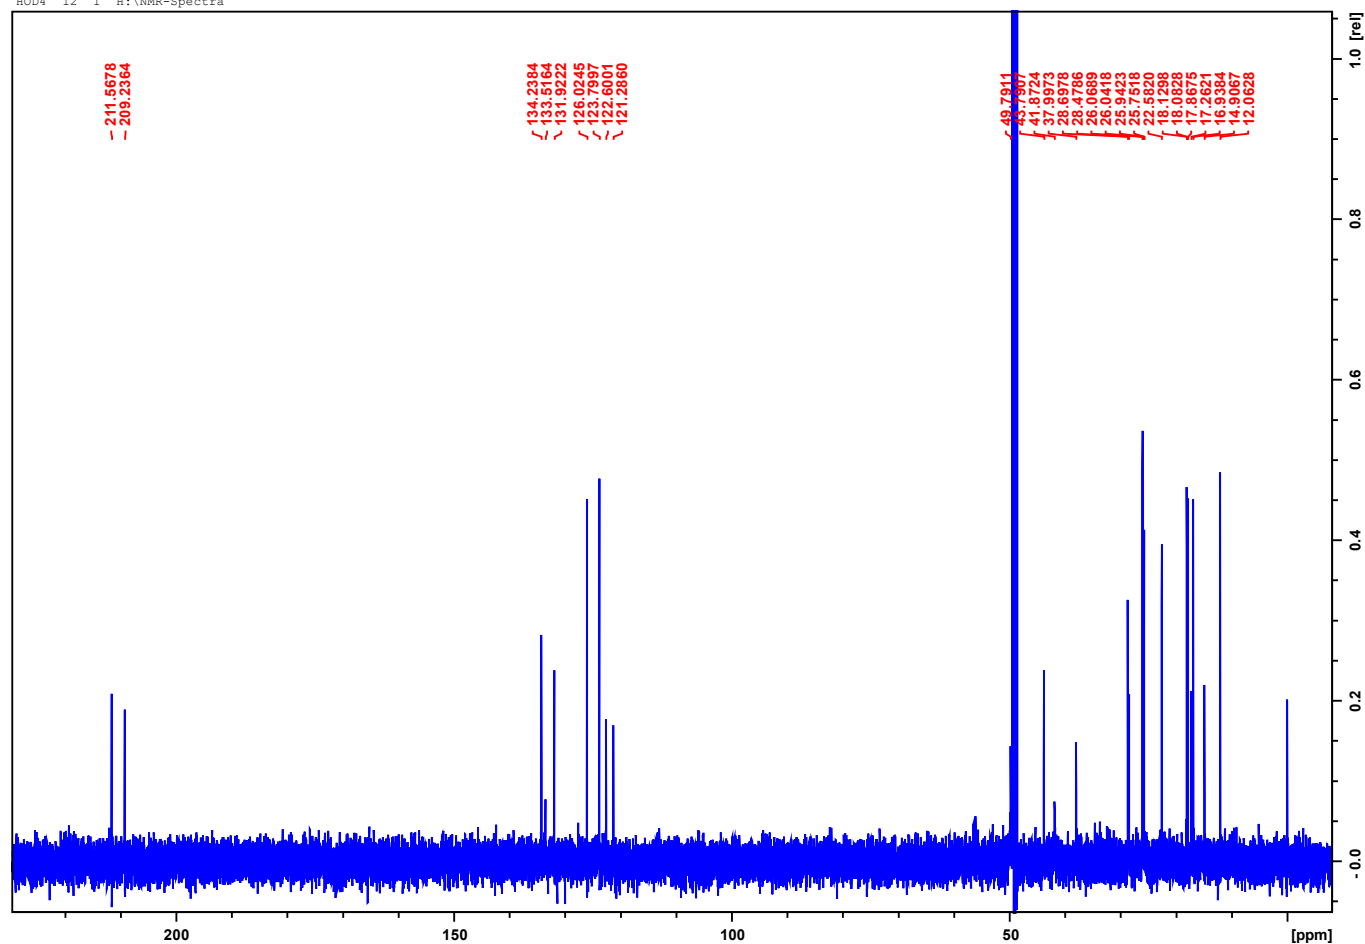Figure S12.  $^{13}\text{C}$ -NMR spectrum of compound 4.

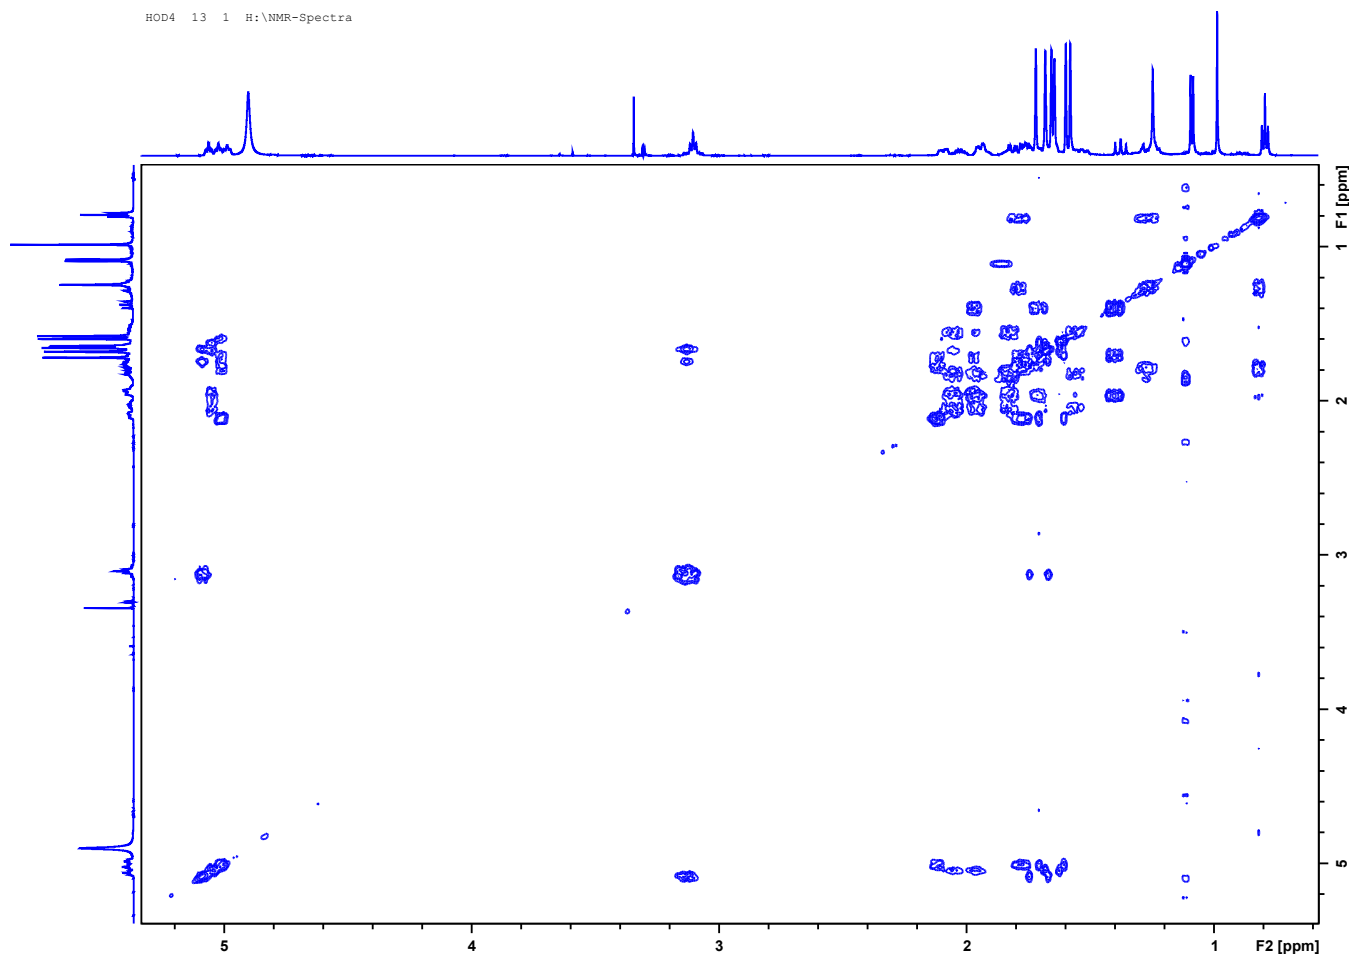Figure S13.  $^1\text{H}$ - $^1\text{H}$  COSY experiment of compound 4.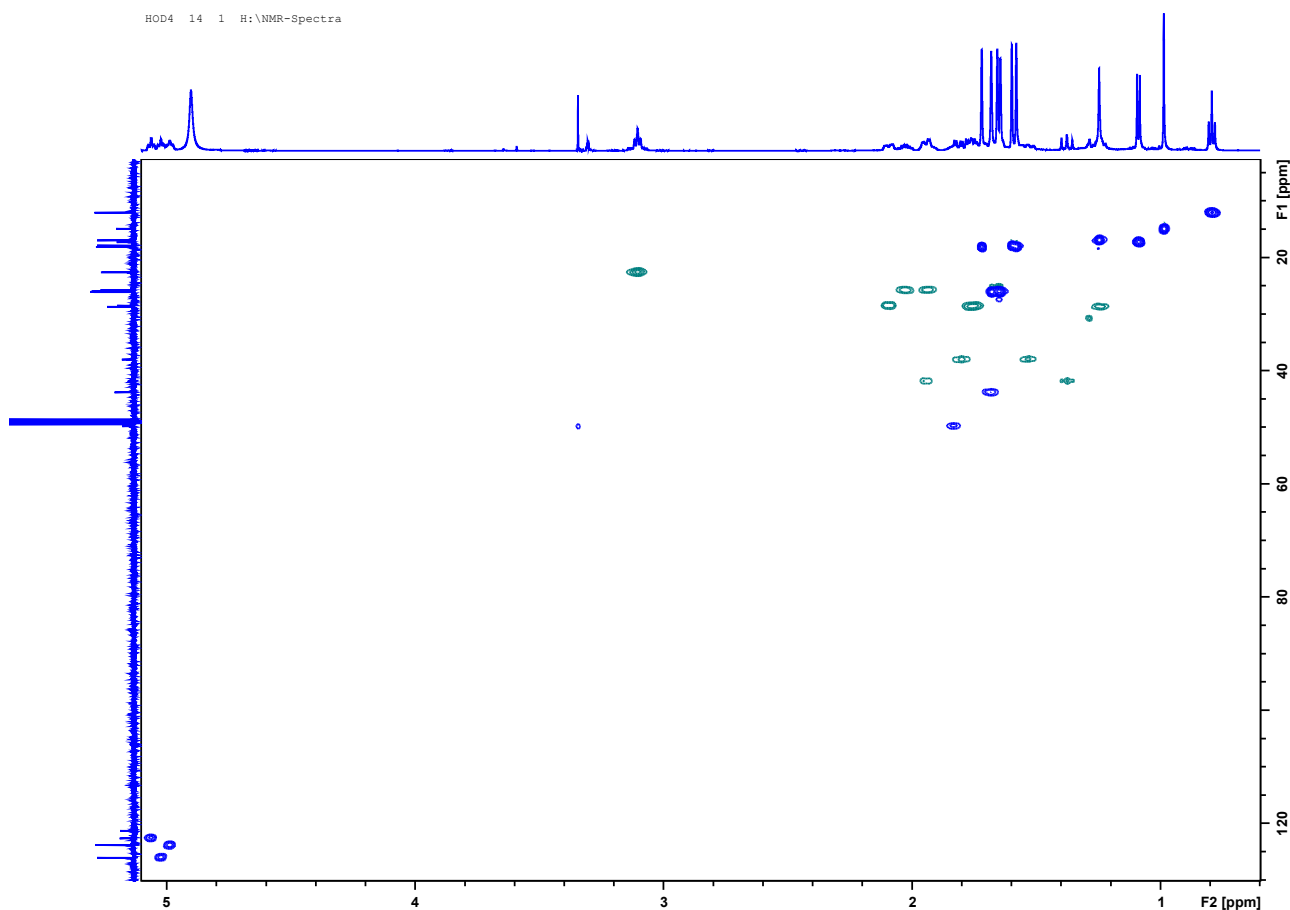

Figure S14. HSQC experiment of compound 4.



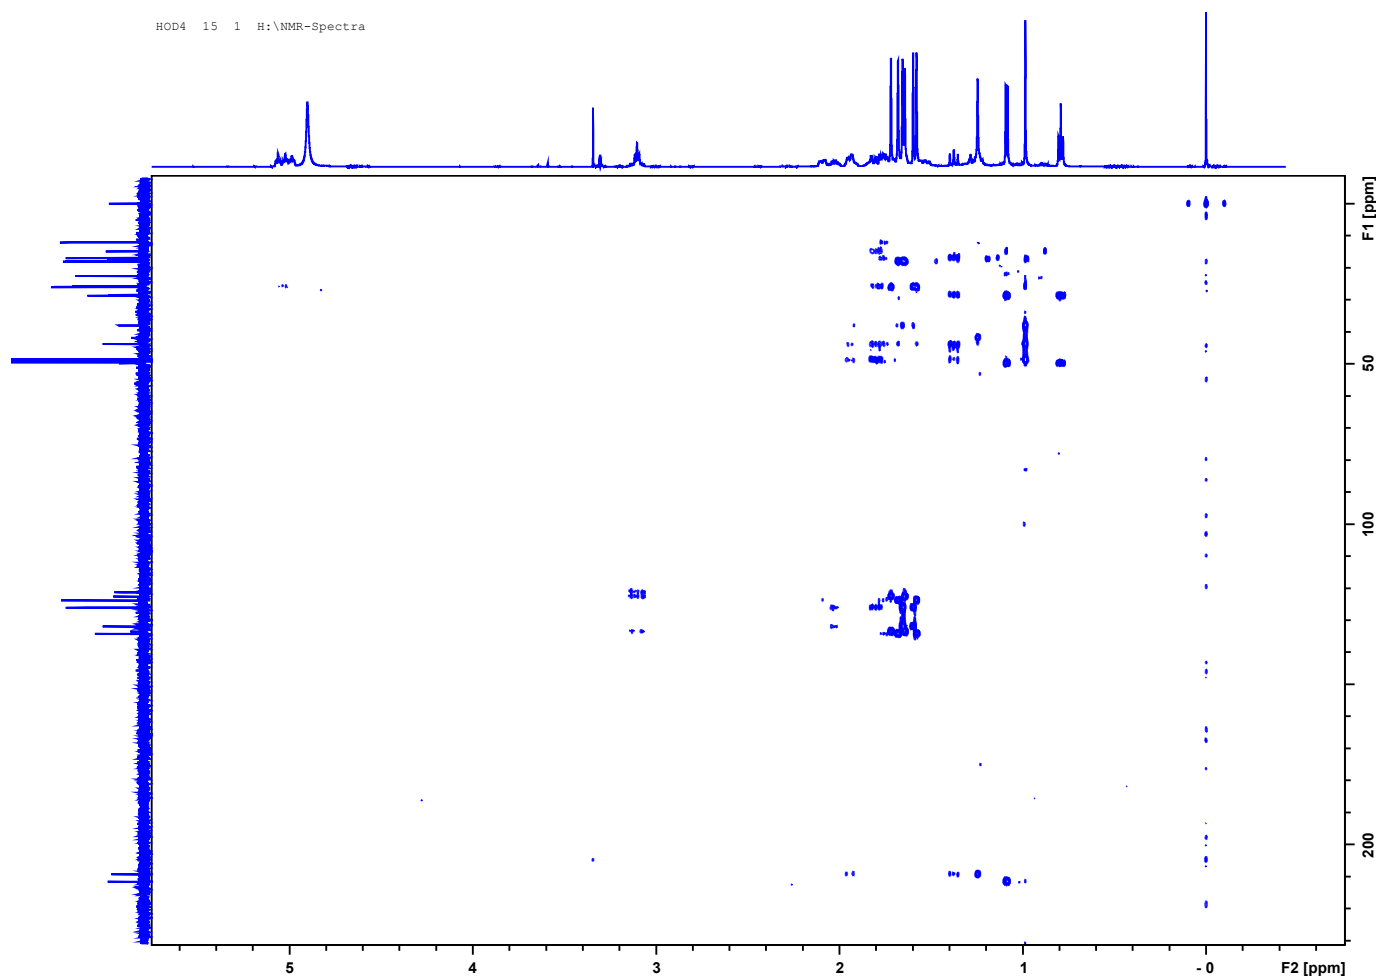

Figure S15. HMBC experiment of compound 4.

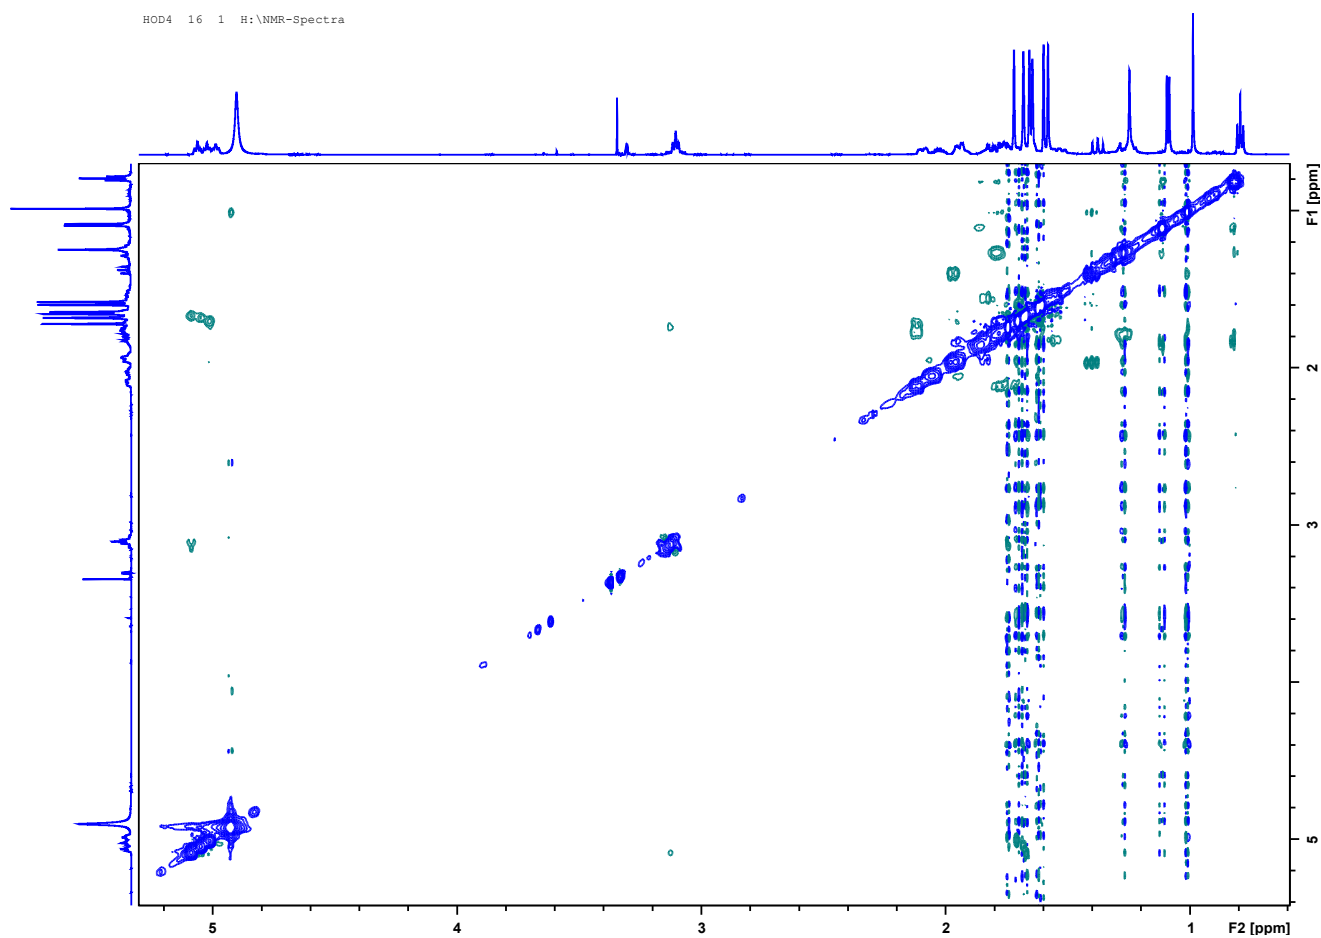

Figure S16. NOESY experiment of compound 4.

HolyDCM H OMe2 #4489-4556 RT: 9.81-9.94 AV: 17 NL: 1.93E8  
T: FTMS + p ESI Full ms [100.00-1000.00]

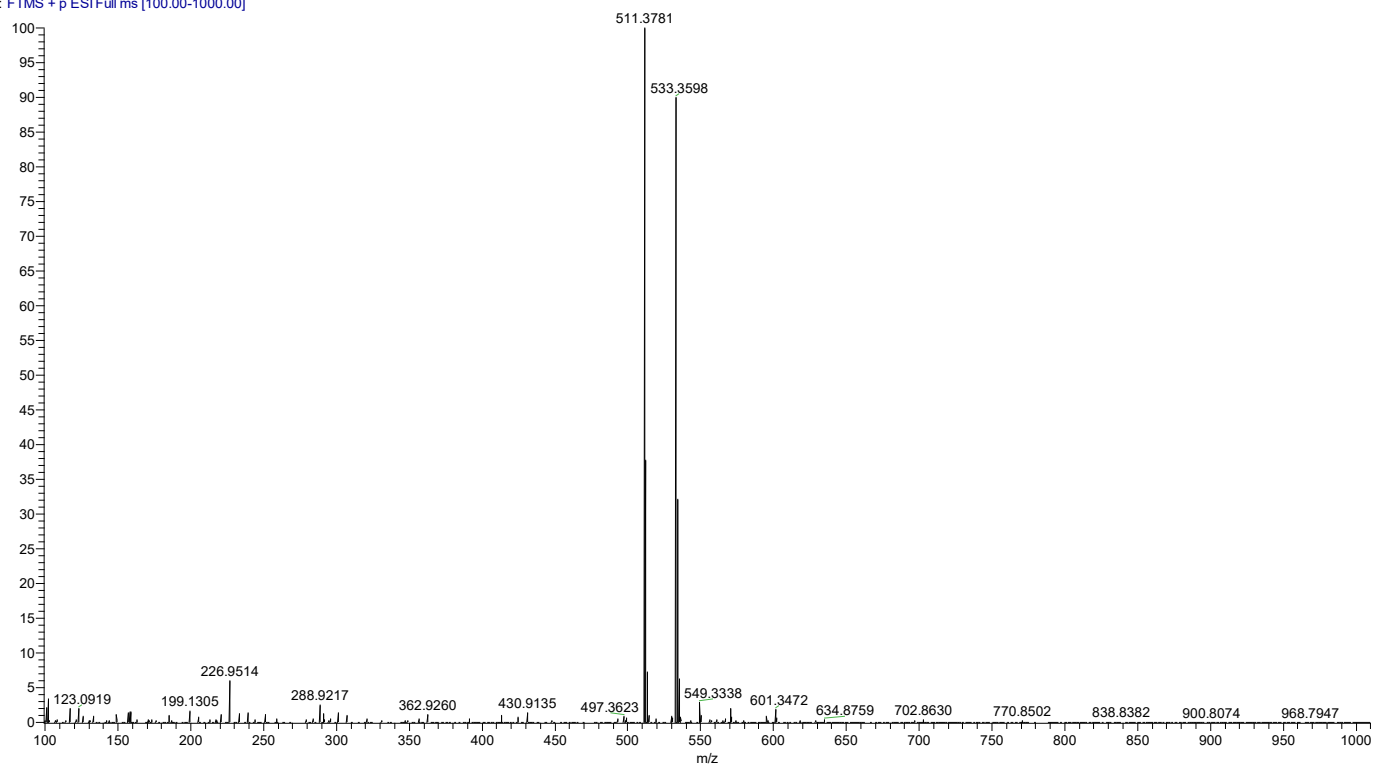

Figure S17. HRESIMS spectrum of compound **4a**.

HolyDCM H OMe2 #4492 RT: 9.81 AV: 1 NL: 6.24E6  
F: FTMS + p ESI d Full ms2 511.39@hcd33.33 [50.00-540.00]

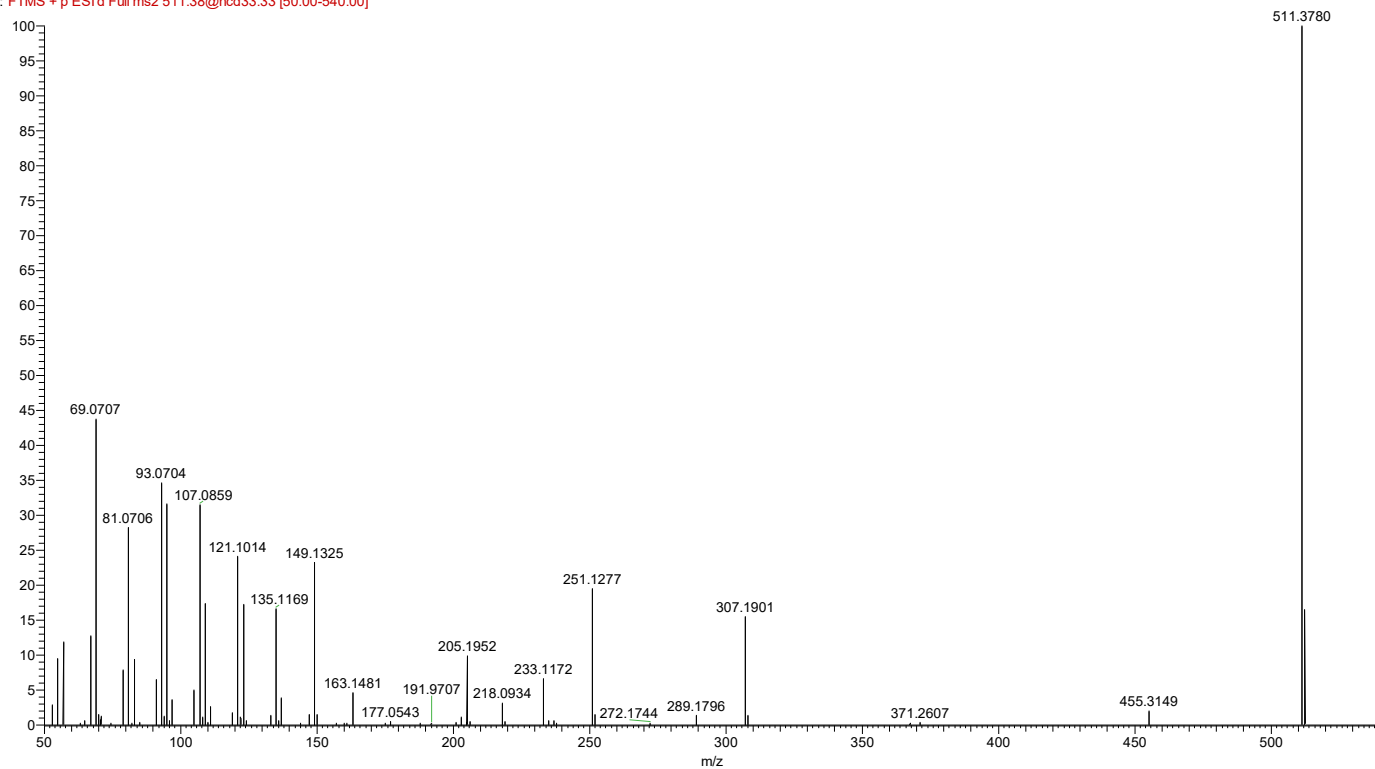

Figure S18. MS/MS spectrum of the protonated molecule  $[M+H]^+$  of compound **4a**.

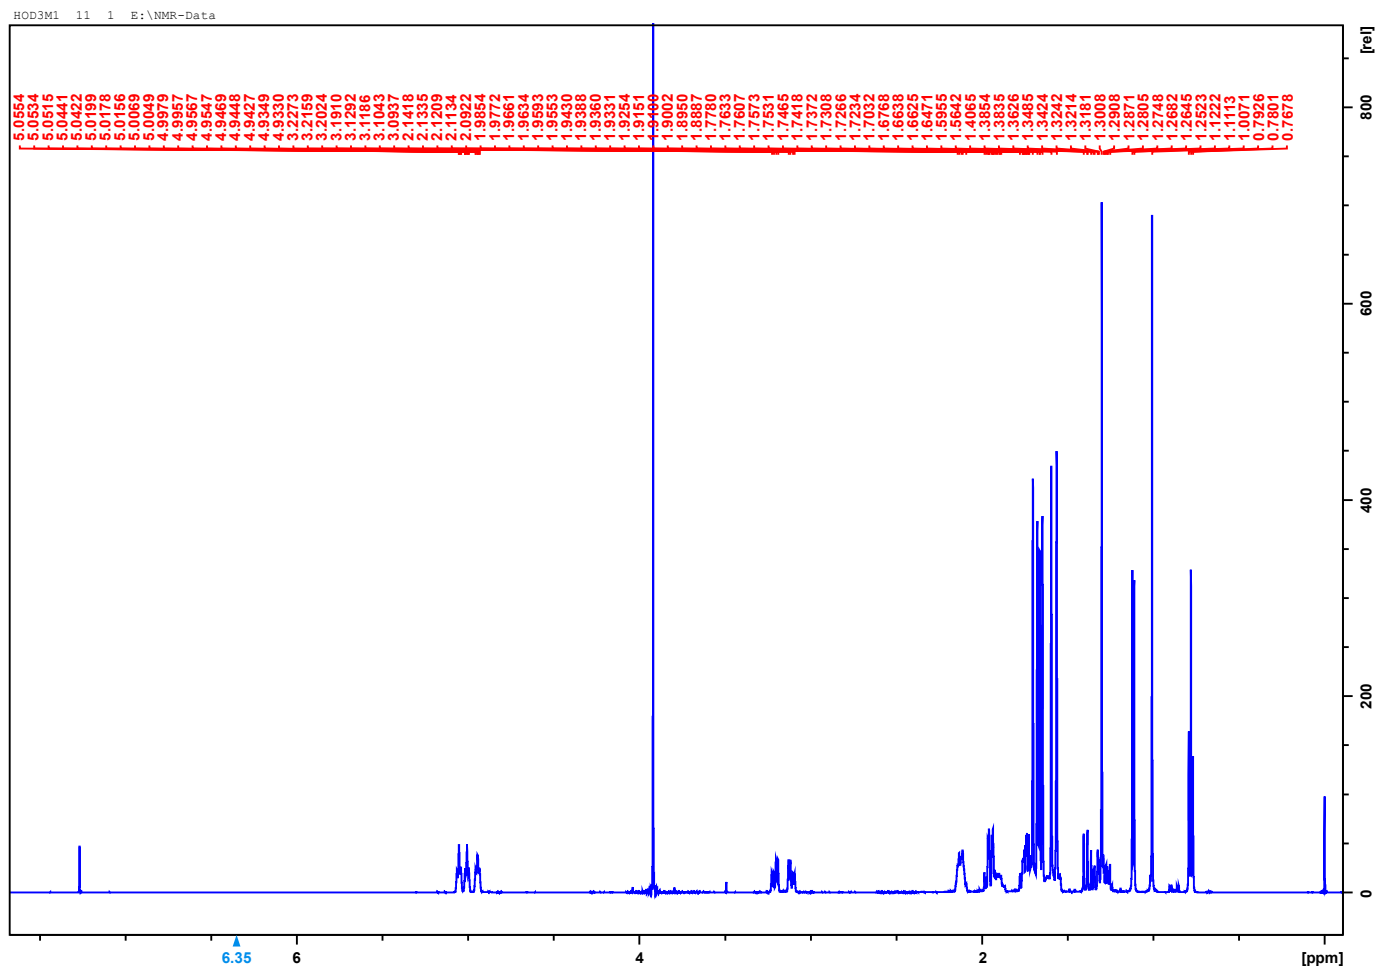

Figure S19.  $^1\text{H}$ -NMR spectrum of compound **4a**.

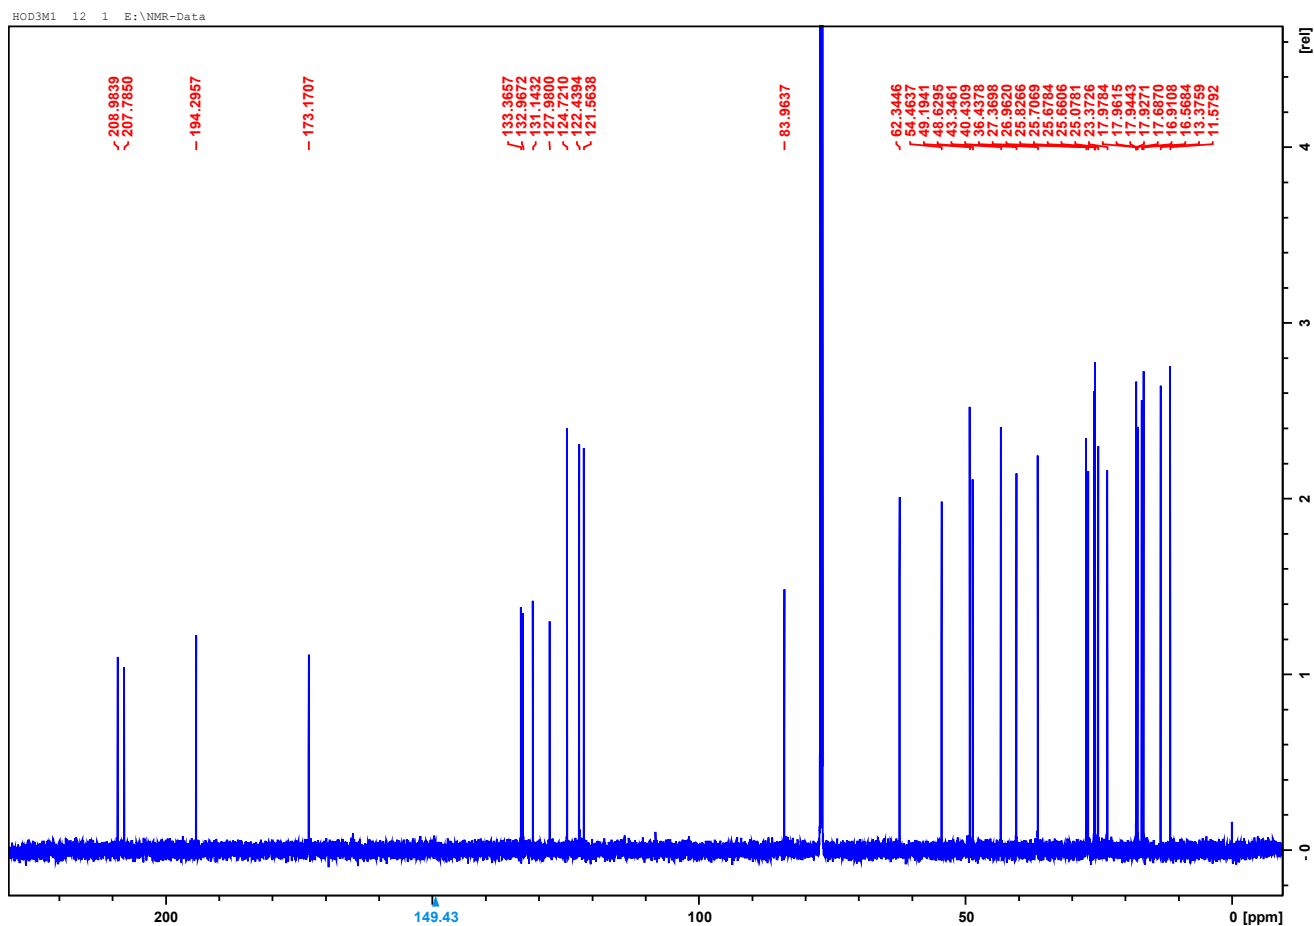

Figure S20.  $^{13}\text{C}$ -NMR spectrum of compound **4a**.

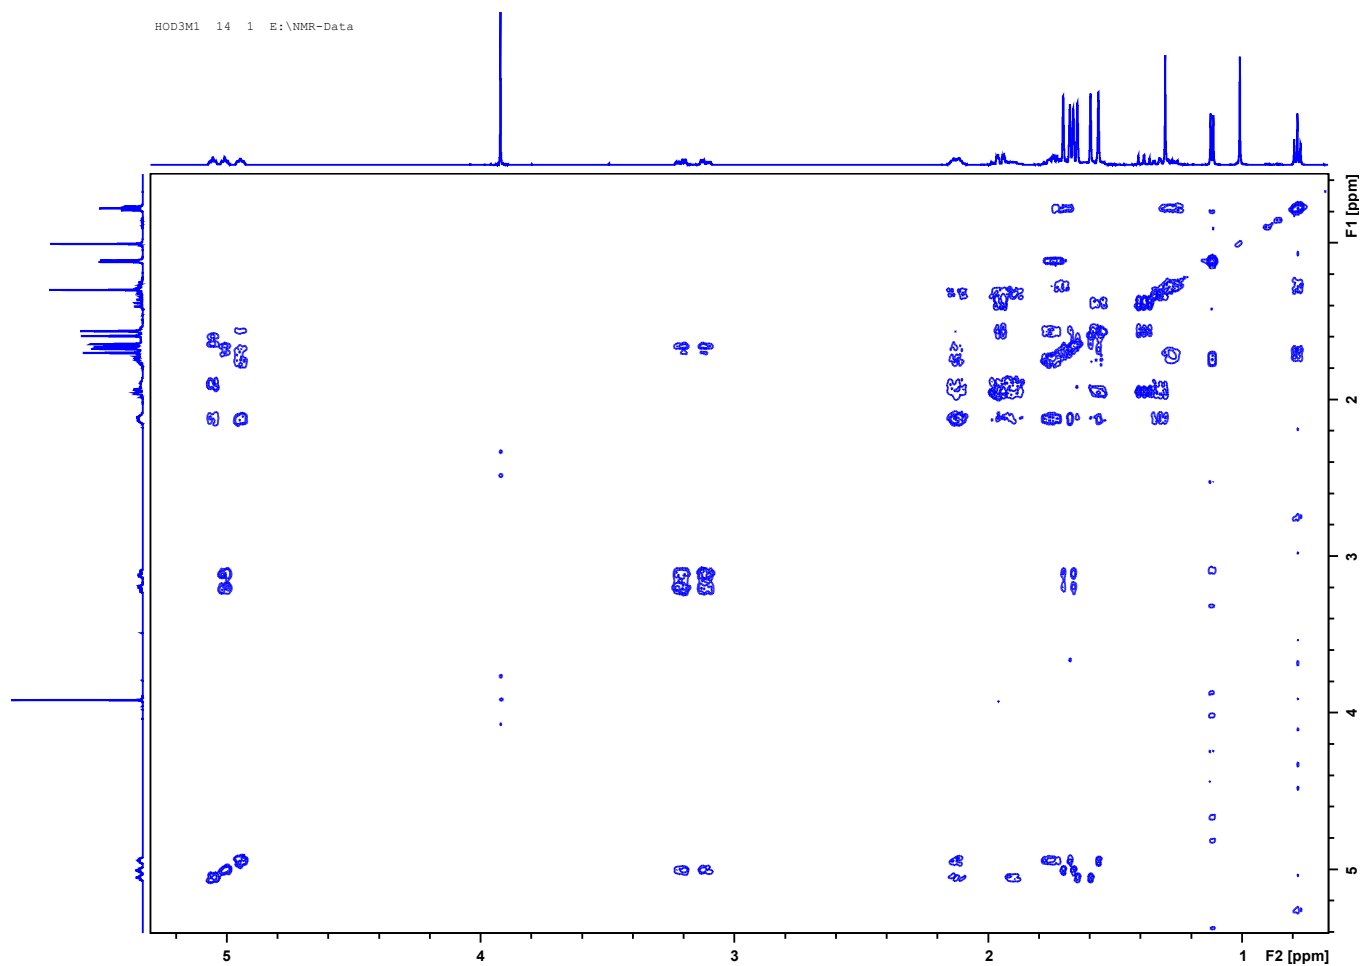Figure S21.  $^1\text{H}$ - $^1\text{H}$  COSY experiment of compound 4a.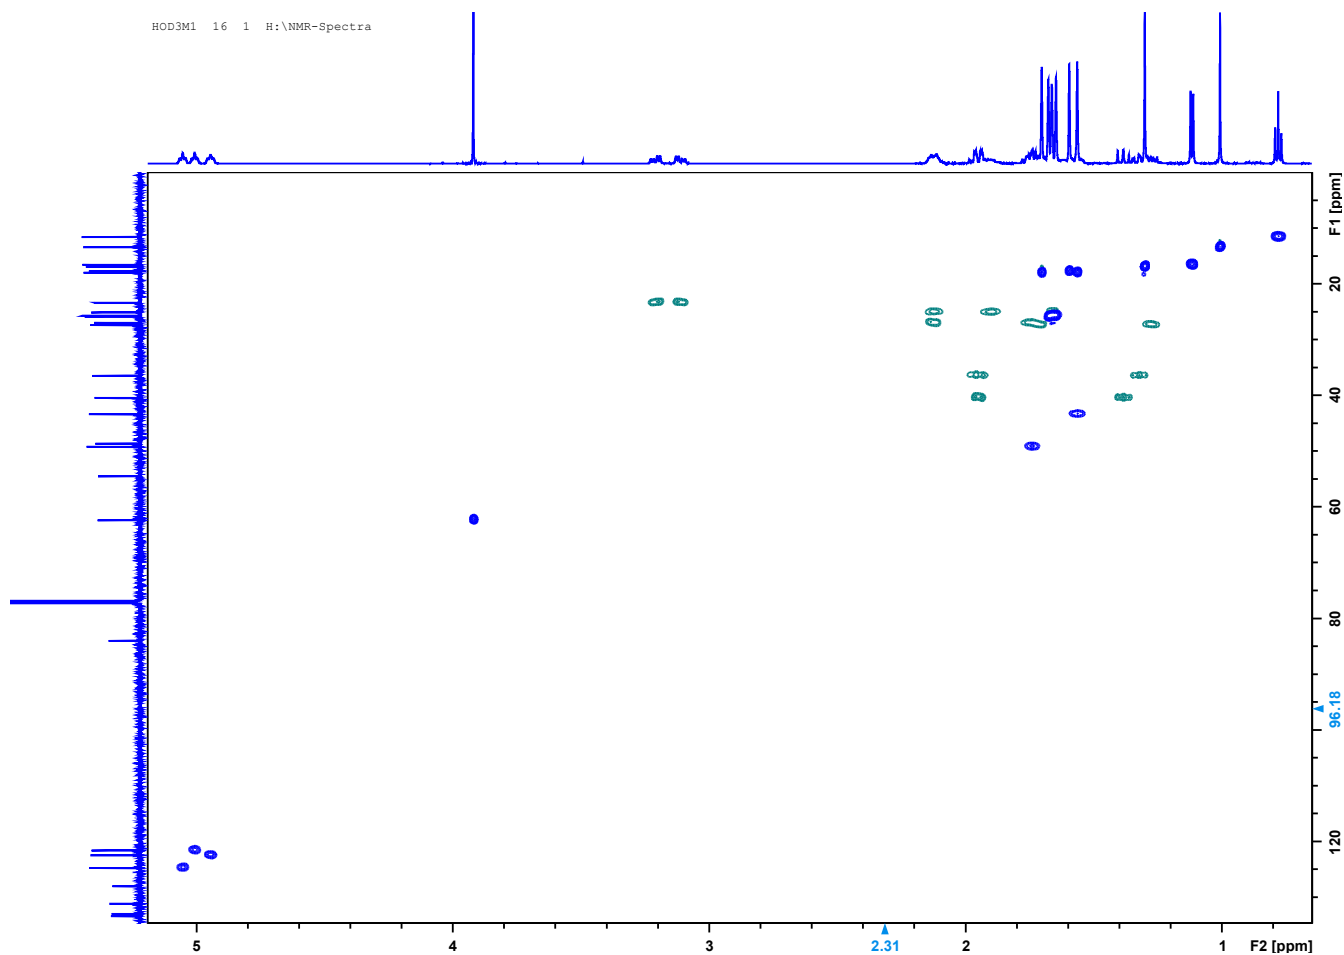

Figure S22. HSQC experiment of compound 4a.

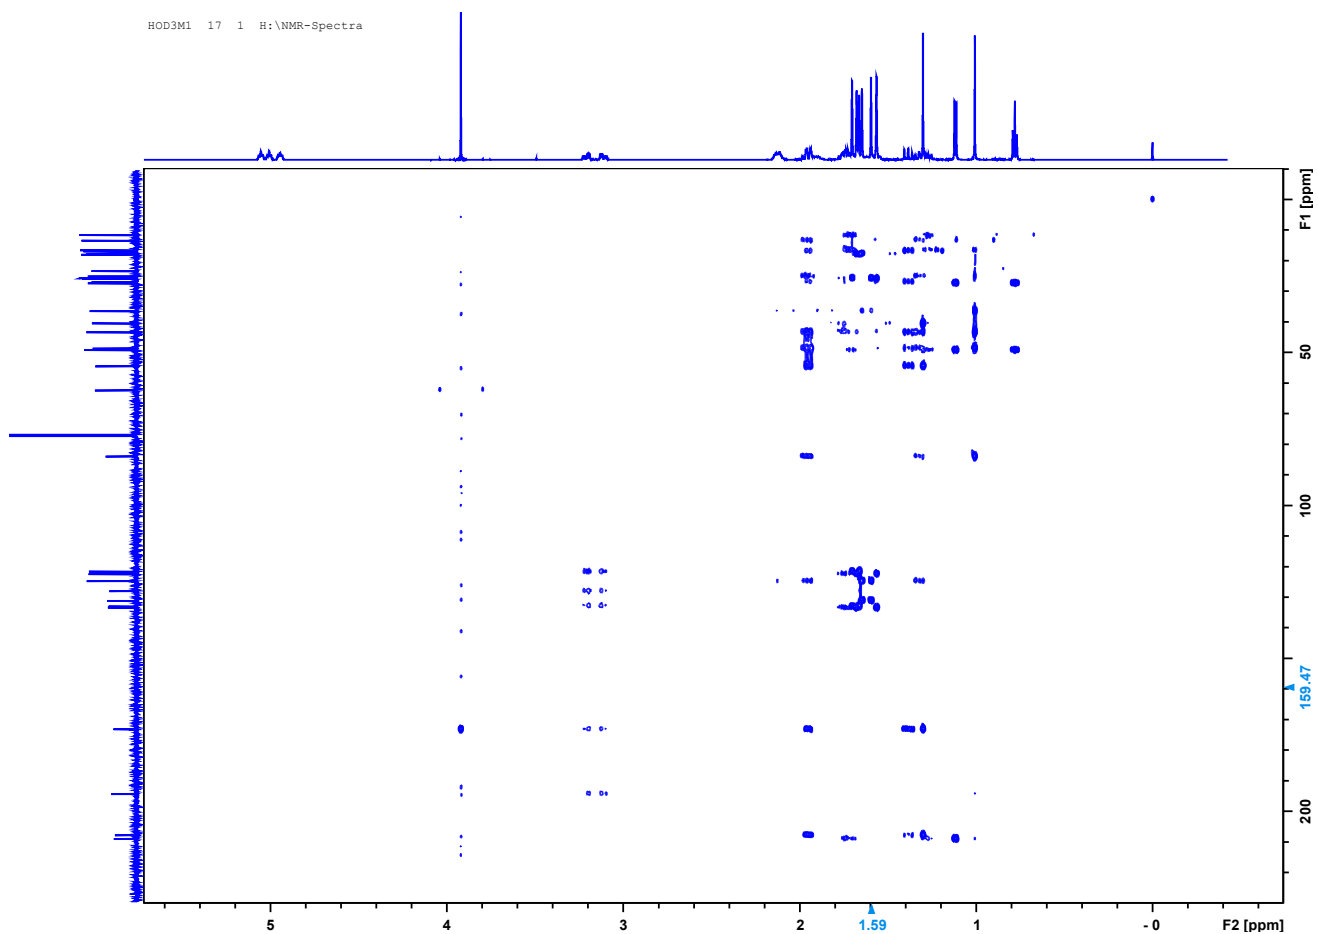

Figure S23. HMBC experiment of compound 4a.

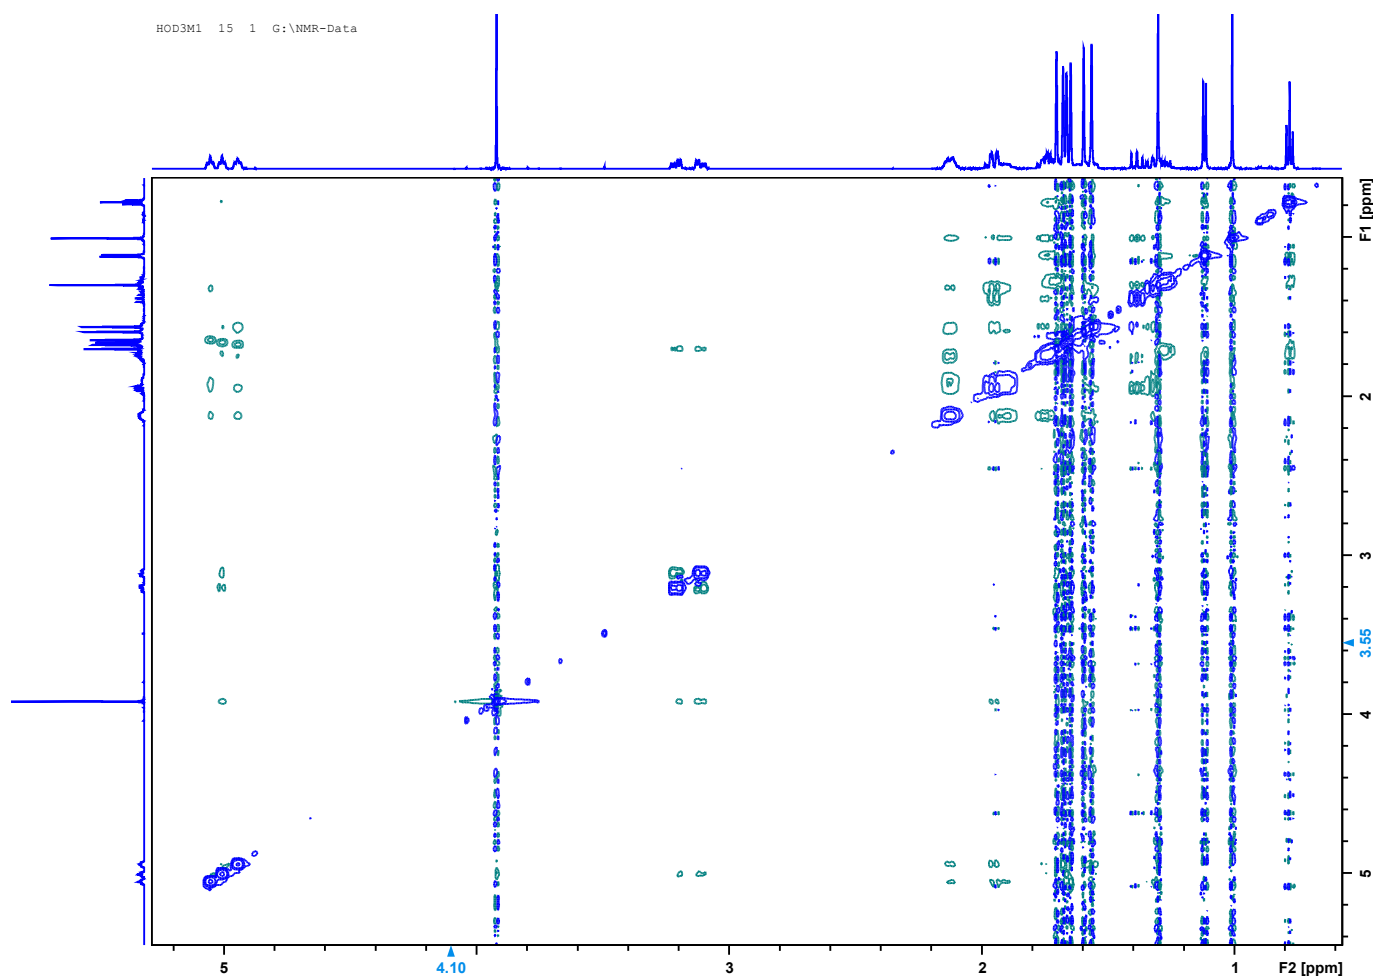

Figure S24. NOESY experiment of compound 4a.

HolyDCM\_H\_OMe2 #5068-5160 RT: 11.02-11.21 AV: 23 NL: 9.03E8  
T: FTMS + p ESI Full ms [100.00-1000.00]

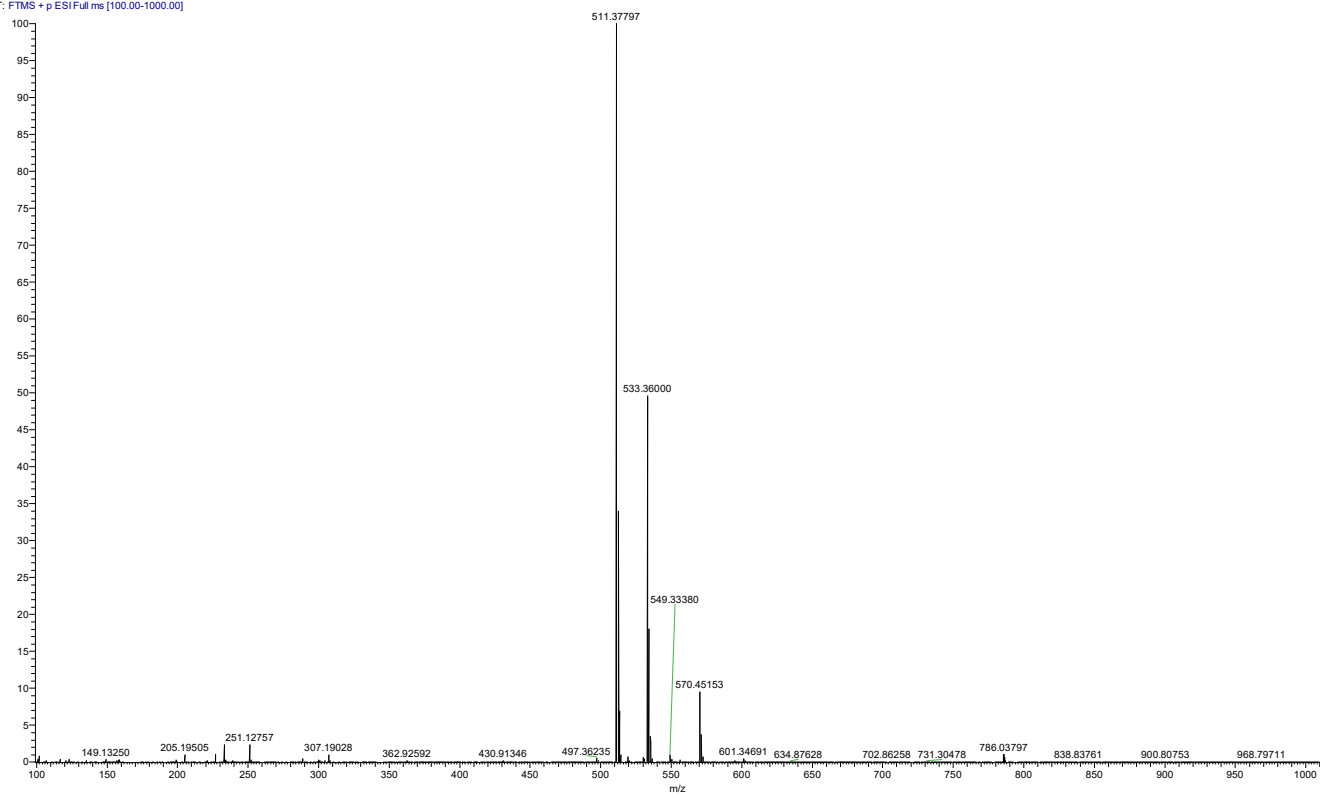

Figure S25. HRESIMS spectrum of compound **4b**.

HolyDCM\_H\_OMe2 #5084 RT: 11.05 AV: 1 NL: 3.29E7  
F: FTMS + p ESI Full ms2 511.38@hcd33.33 [50.00-540.00]

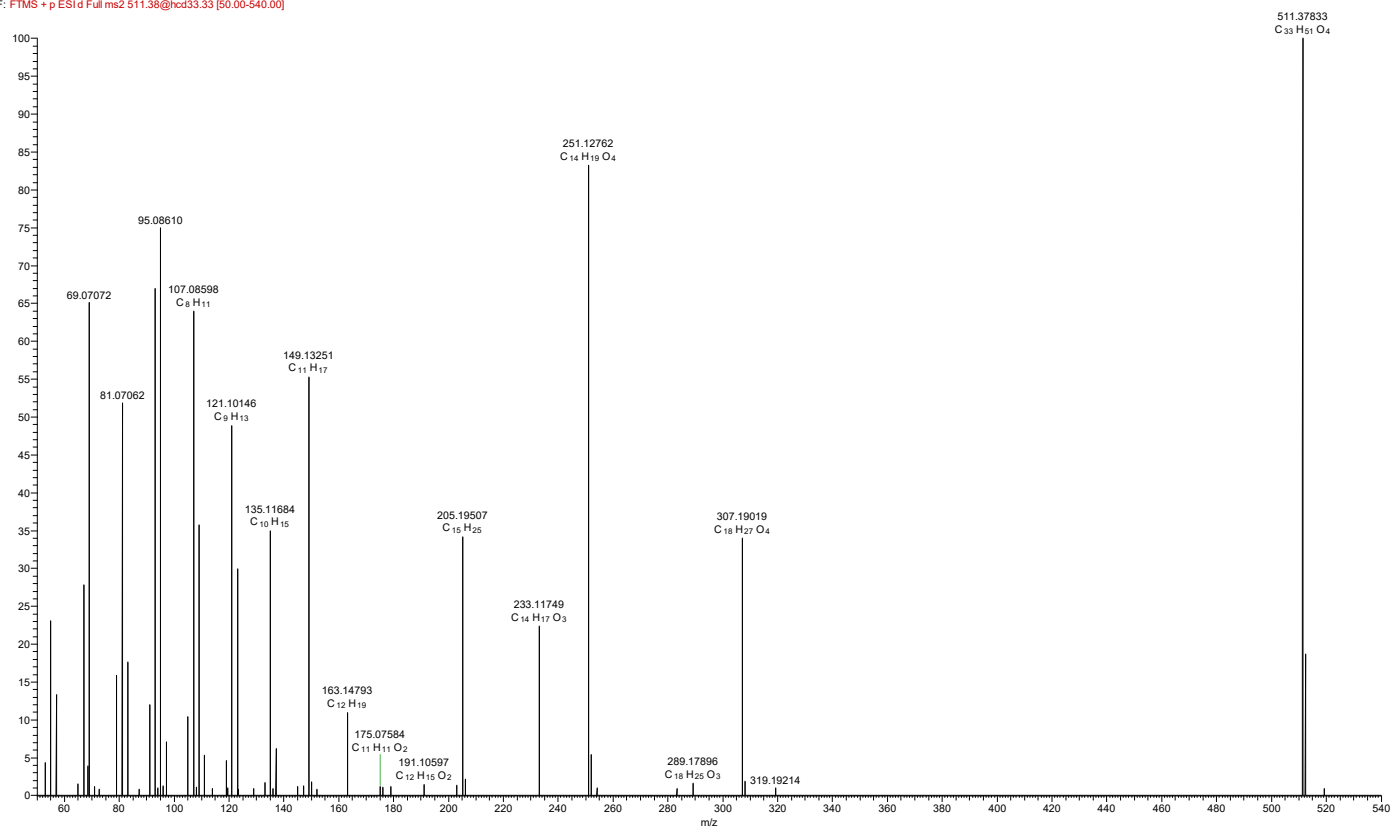

Figure S26. MS/MS spectrum of the protonated molecule [M+H]<sup>+</sup> of compound **4b**.

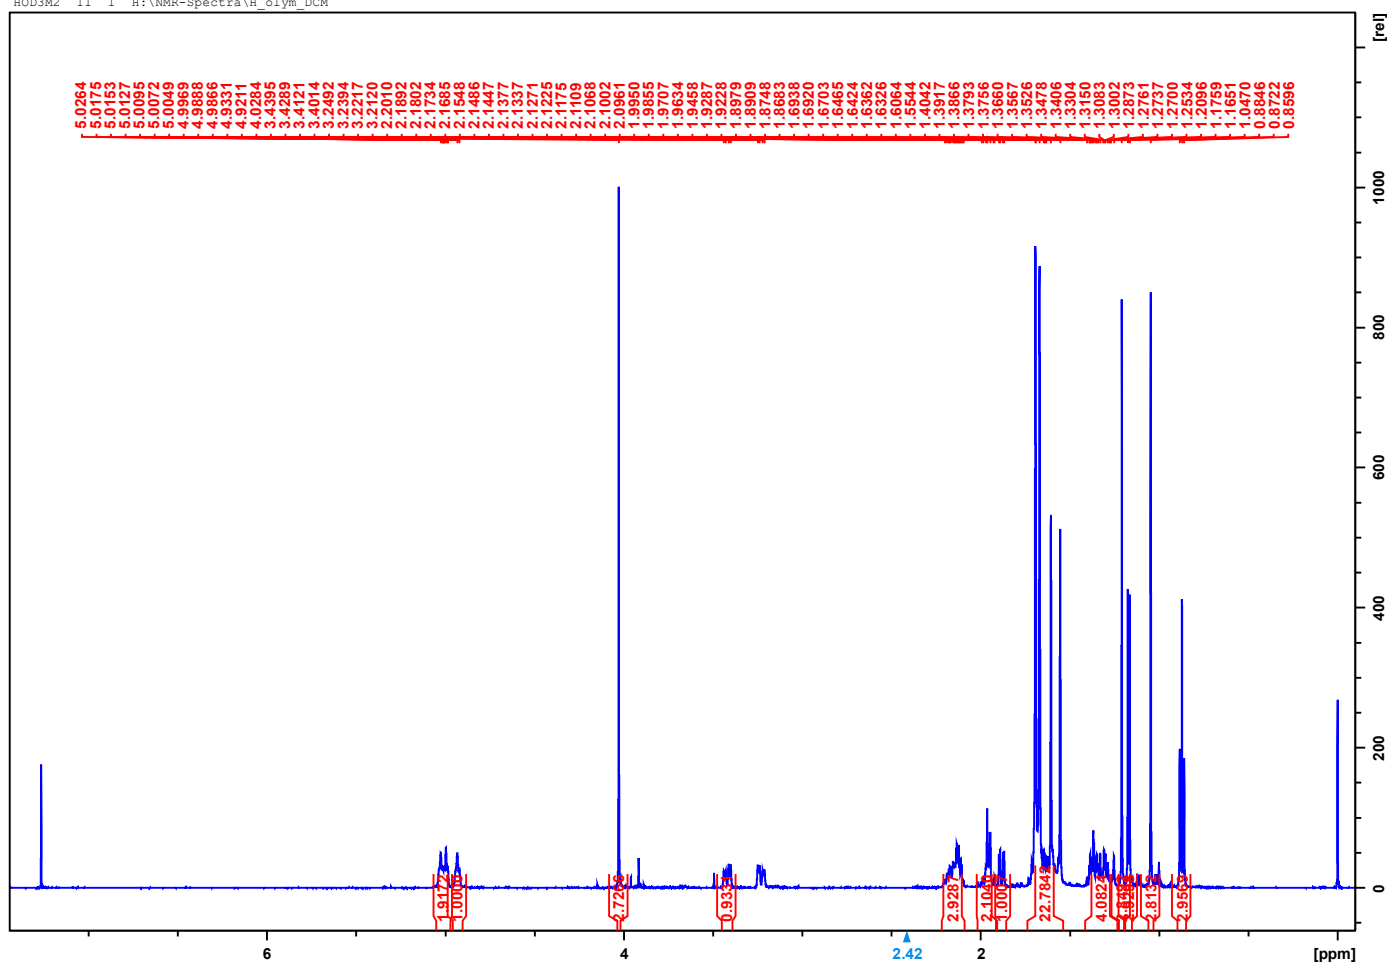Figure S27. <sup>1</sup>H-NMR spectrum of compound 4b.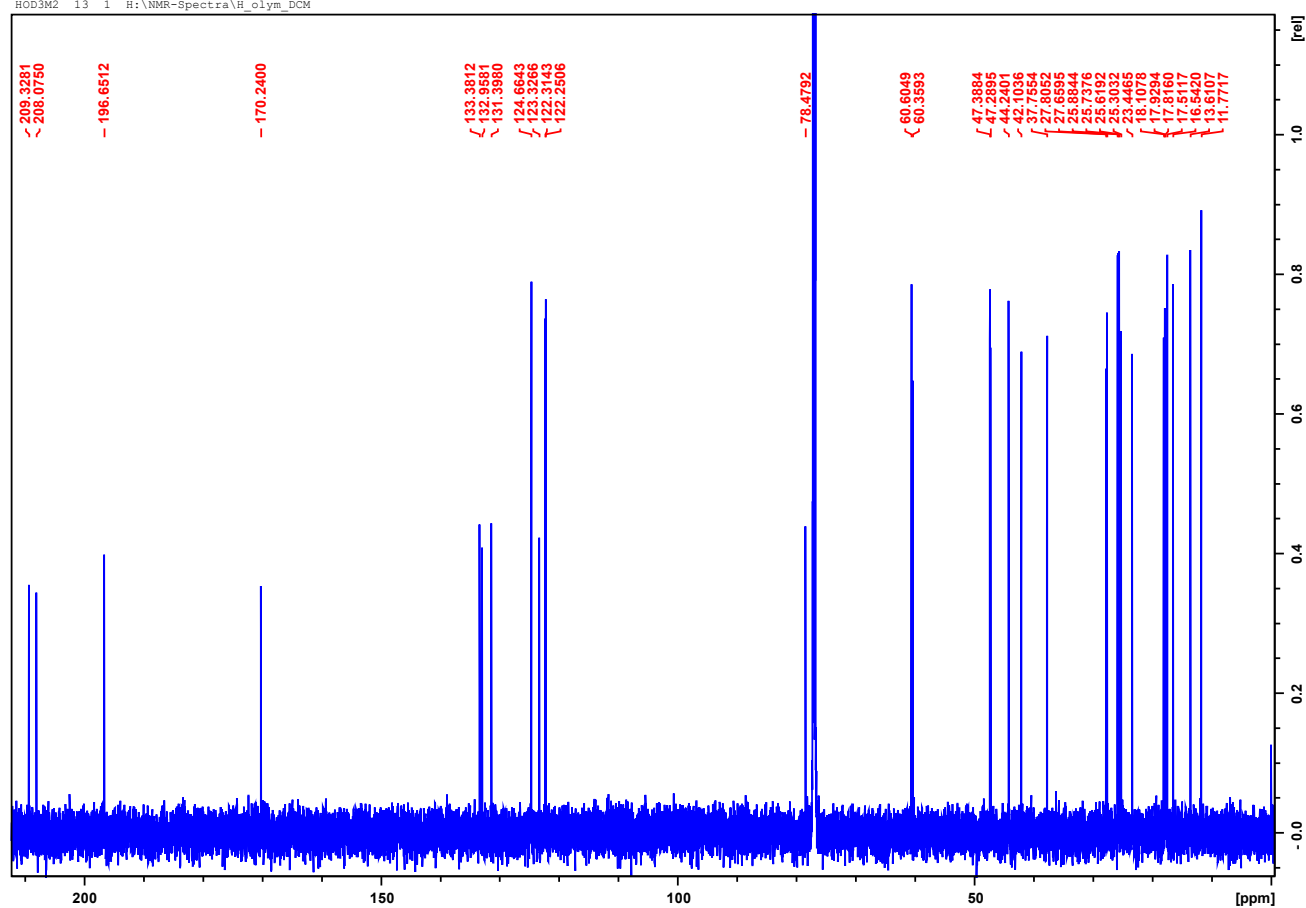Figure S28. <sup>13</sup>C-NMR spectrum of compound 4b.

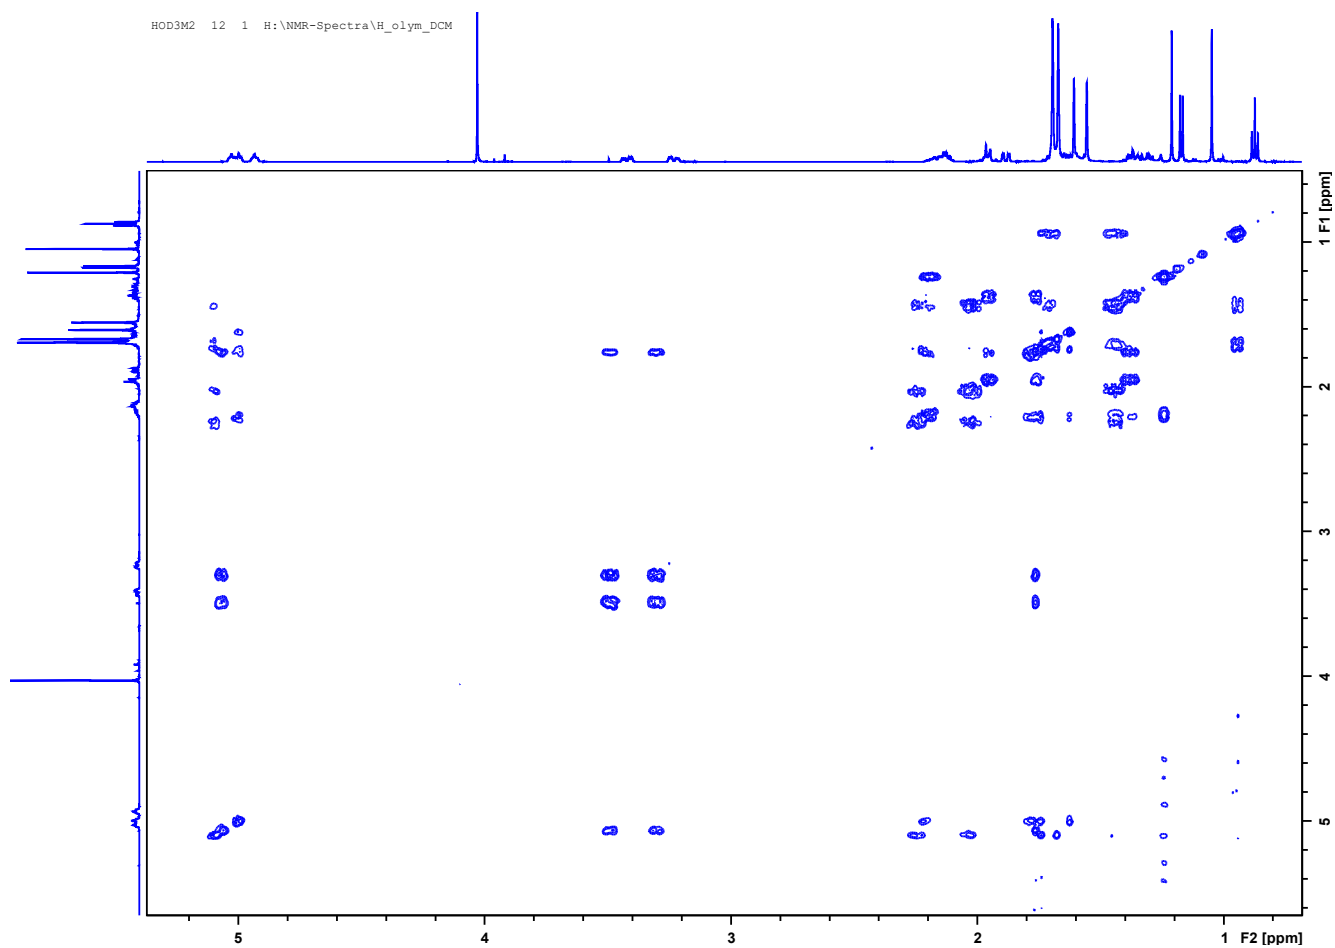

Figure S29.  $^1\text{H}$ - $^1\text{H}$  COSY experiment of compound **4a**.

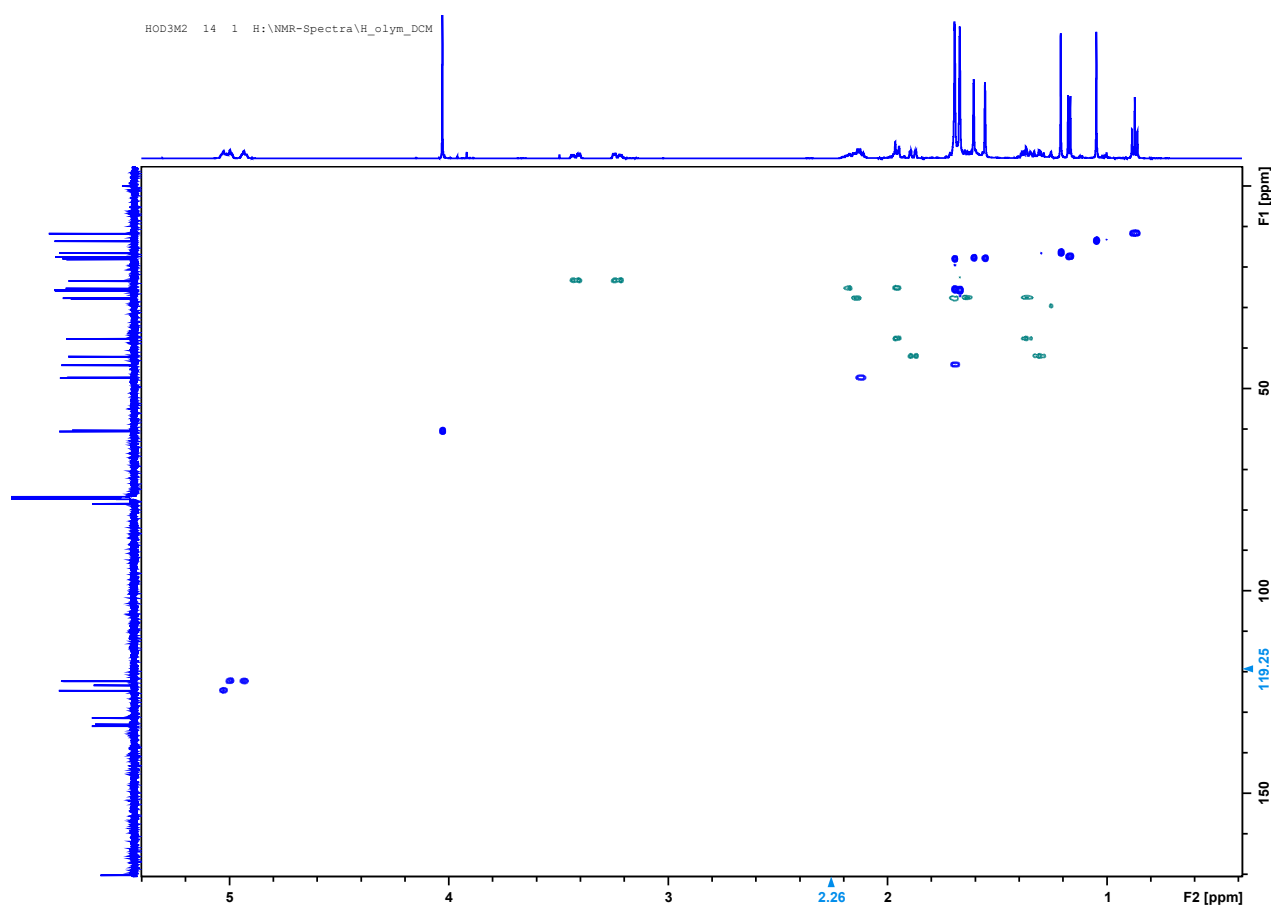

Figure S30. HSQC experiment of compound **4b**.



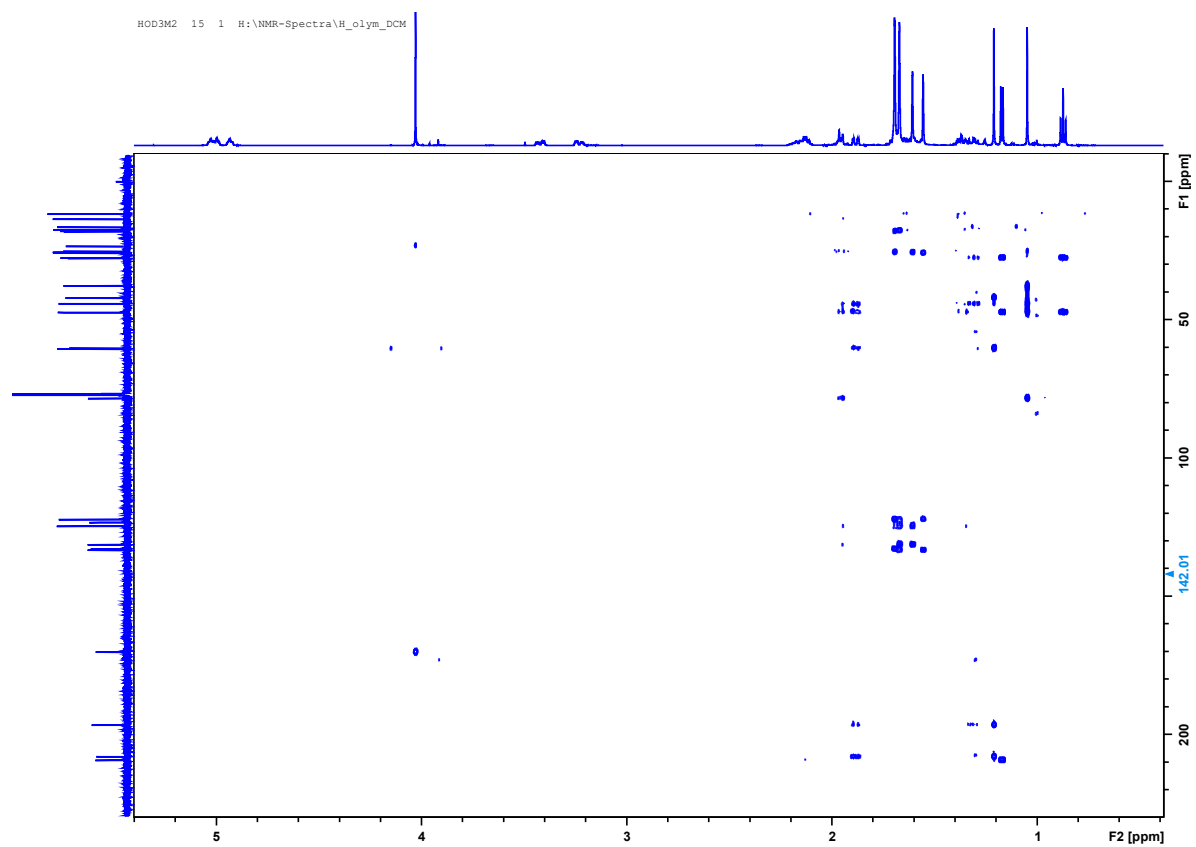

Figure S31. HMBC experiment of compound **4b**.

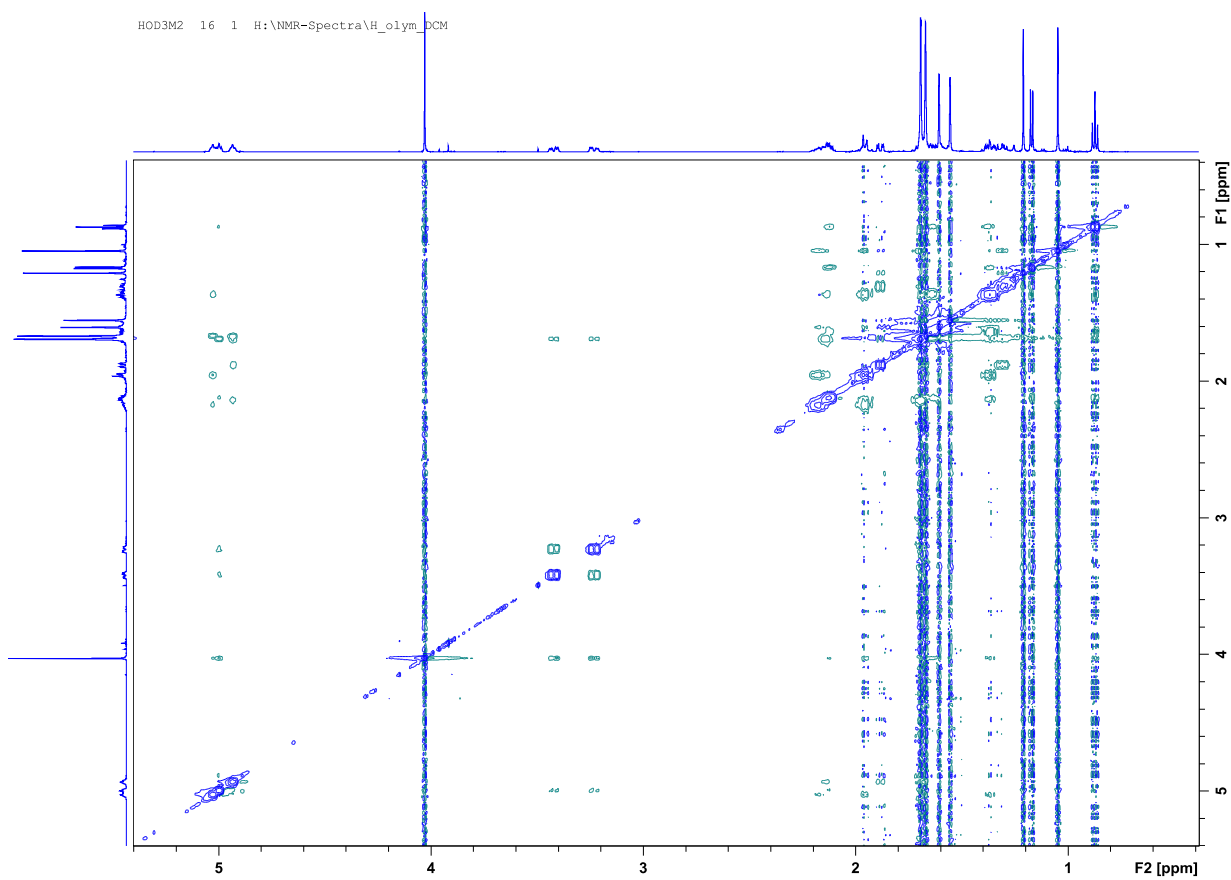

Figure S32. NOESY experiment of compound **4b**.

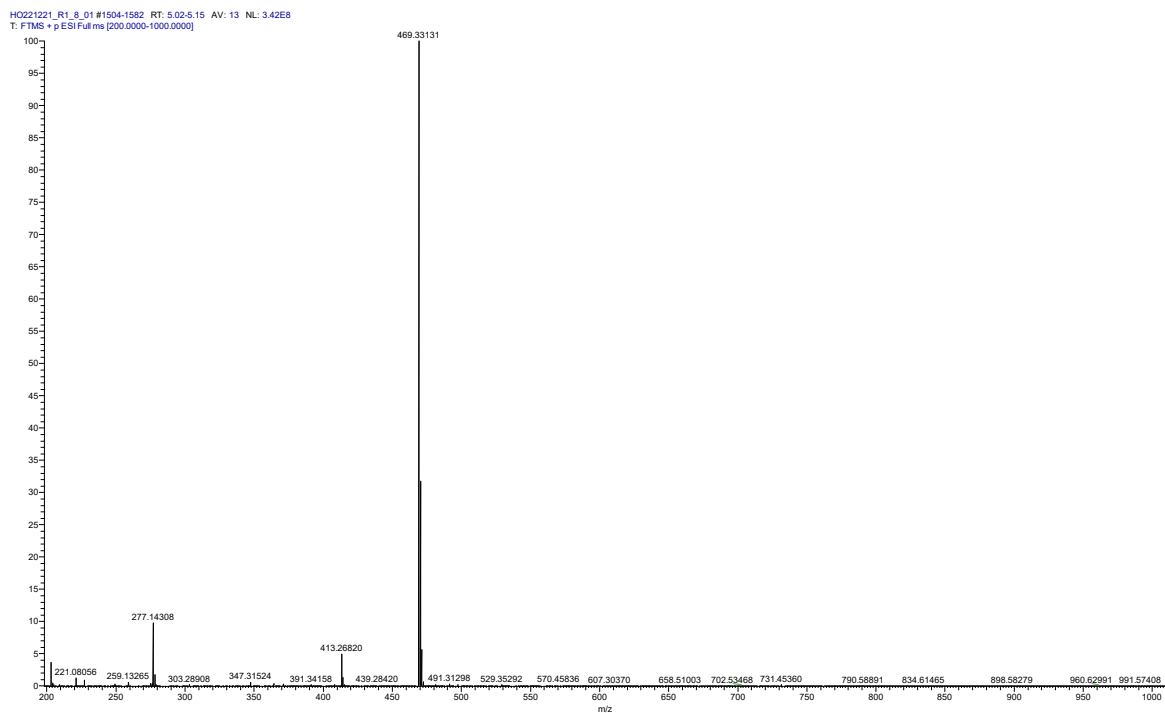

**Figure S33.** HRESIMS spectrum of compound **5**.

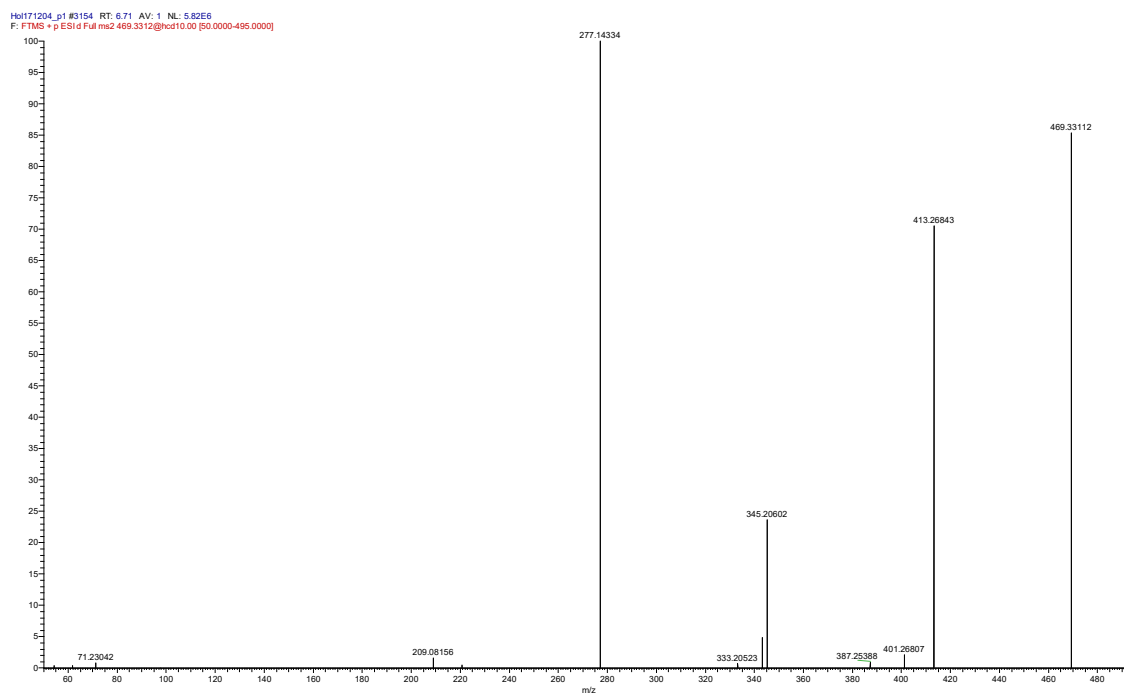

**Figure S34.** MS/MS spectrum of the protonated molecule  $[M+H]^+$  of compound **5**.

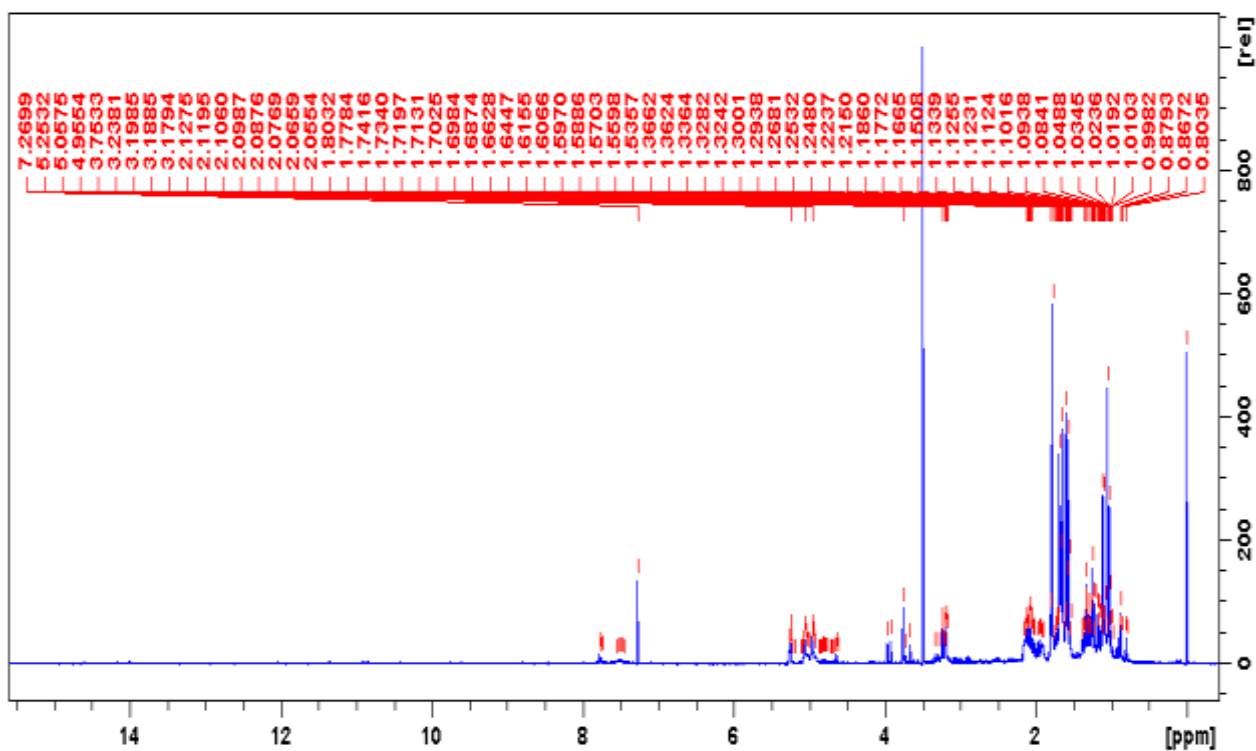

Figure S35.  $^1\text{H}$ -NMR spectrum of compound 5.

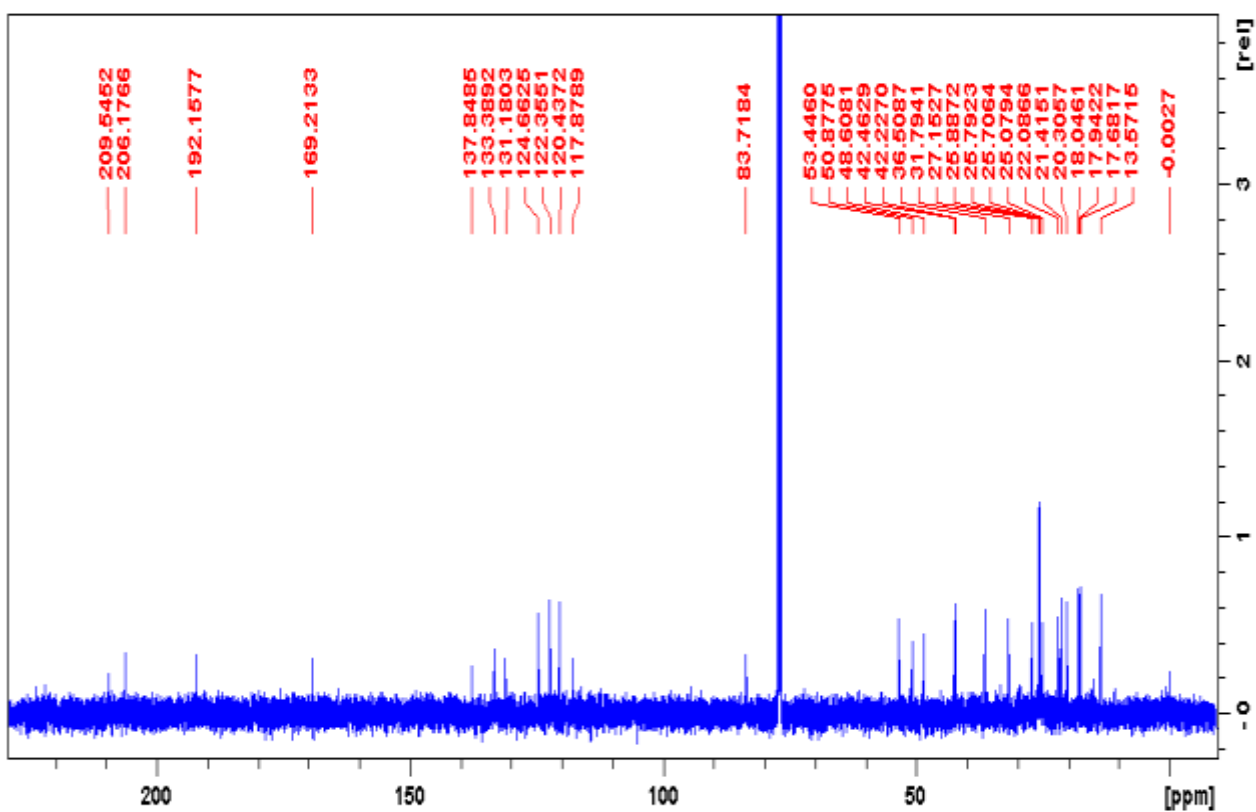

Figure S36.  $^{13}\text{C}$ -NMR spectrum of 5.

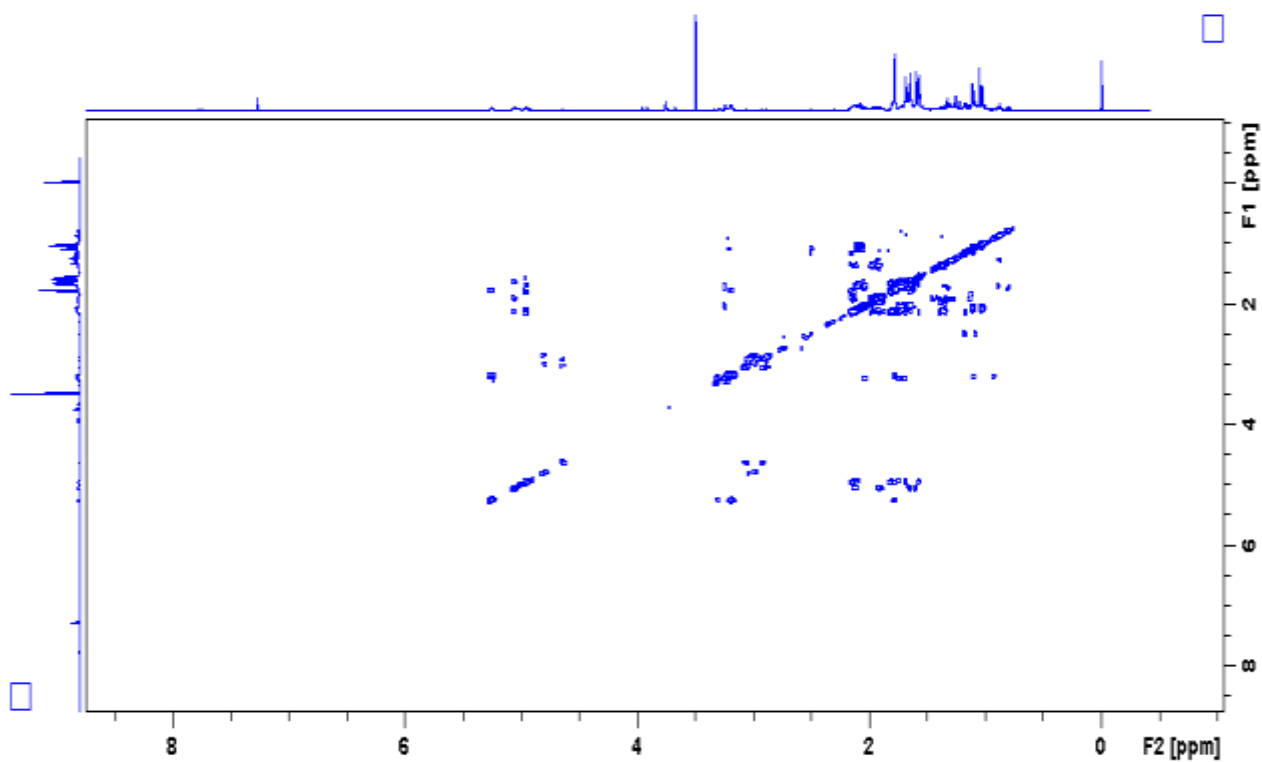

Figure S37.  $^1\text{H}$ - $^1\text{H}$  COSY experiment of compound 5.

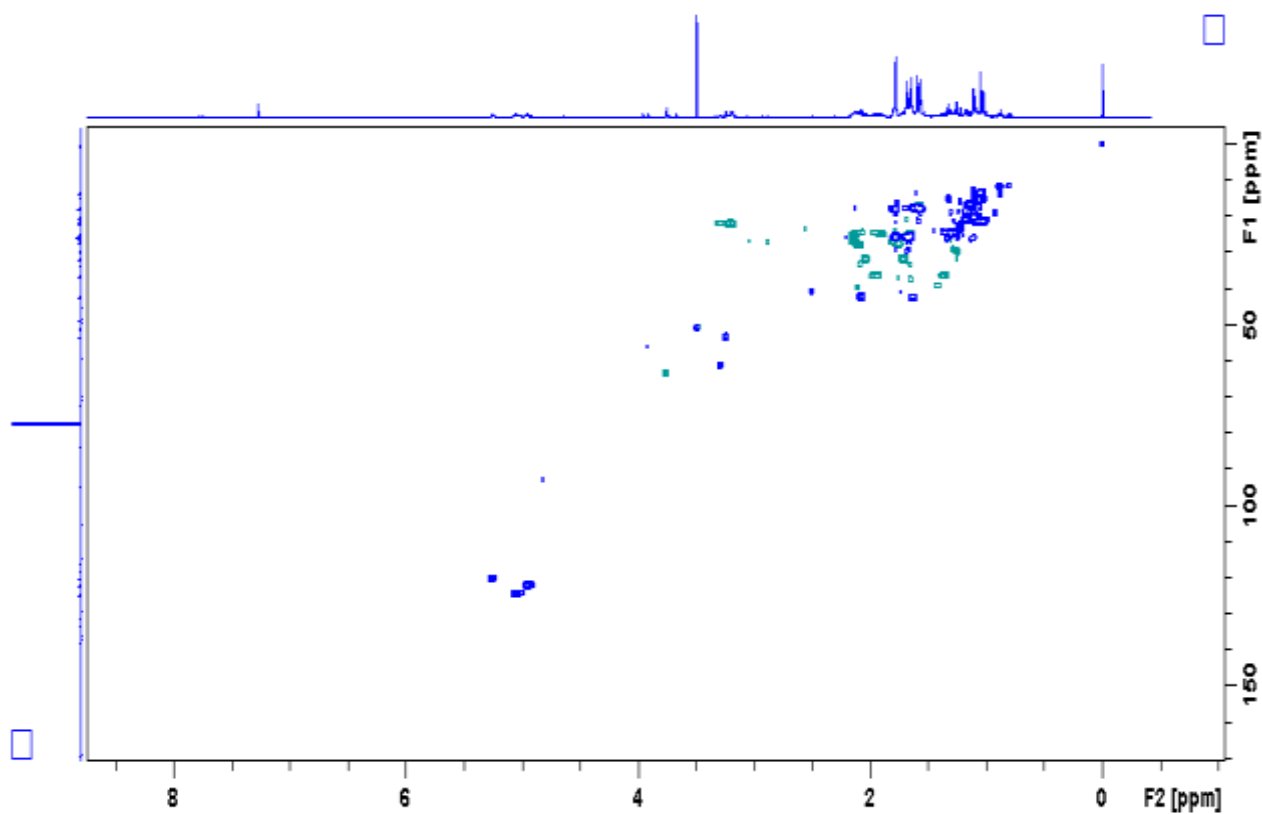

Figure S38. HSQC experiment of 5.

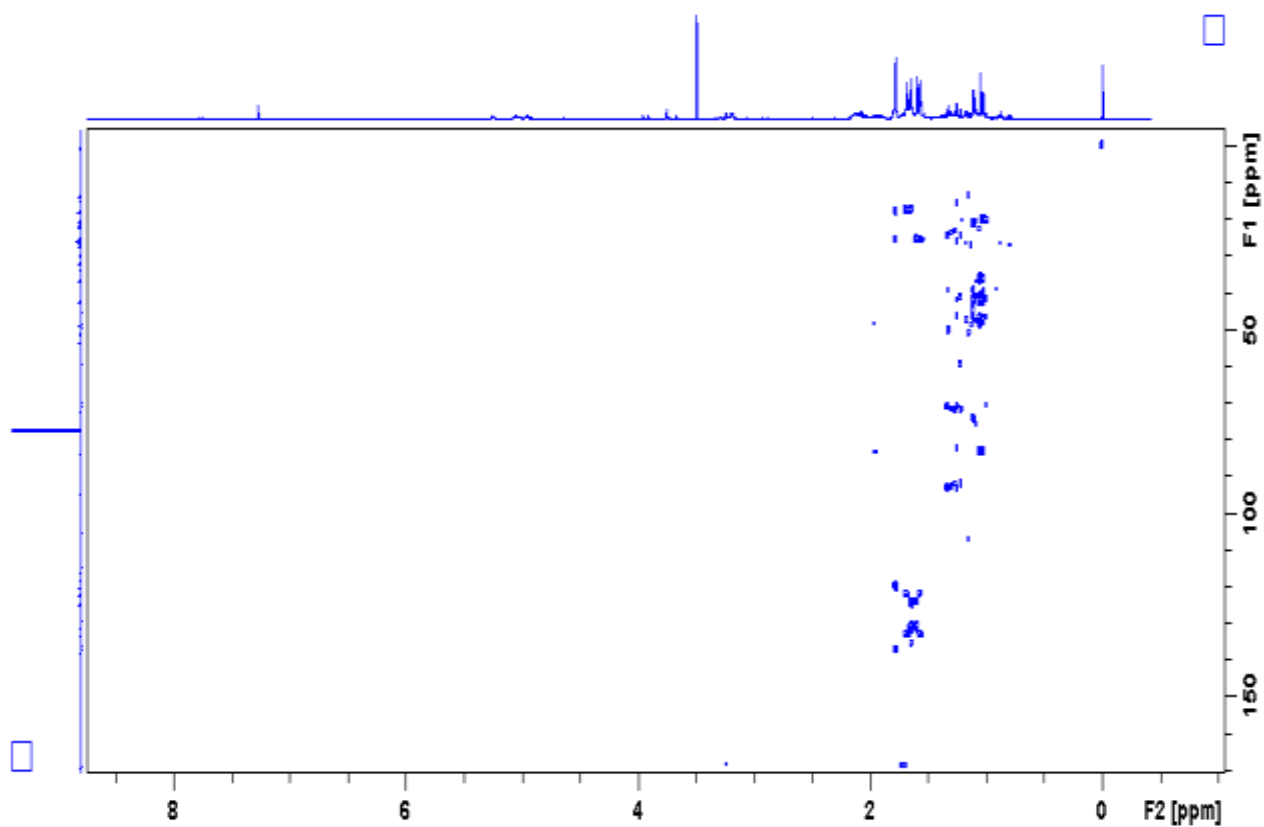

Figure S39. HMBC experiment of compound 5.

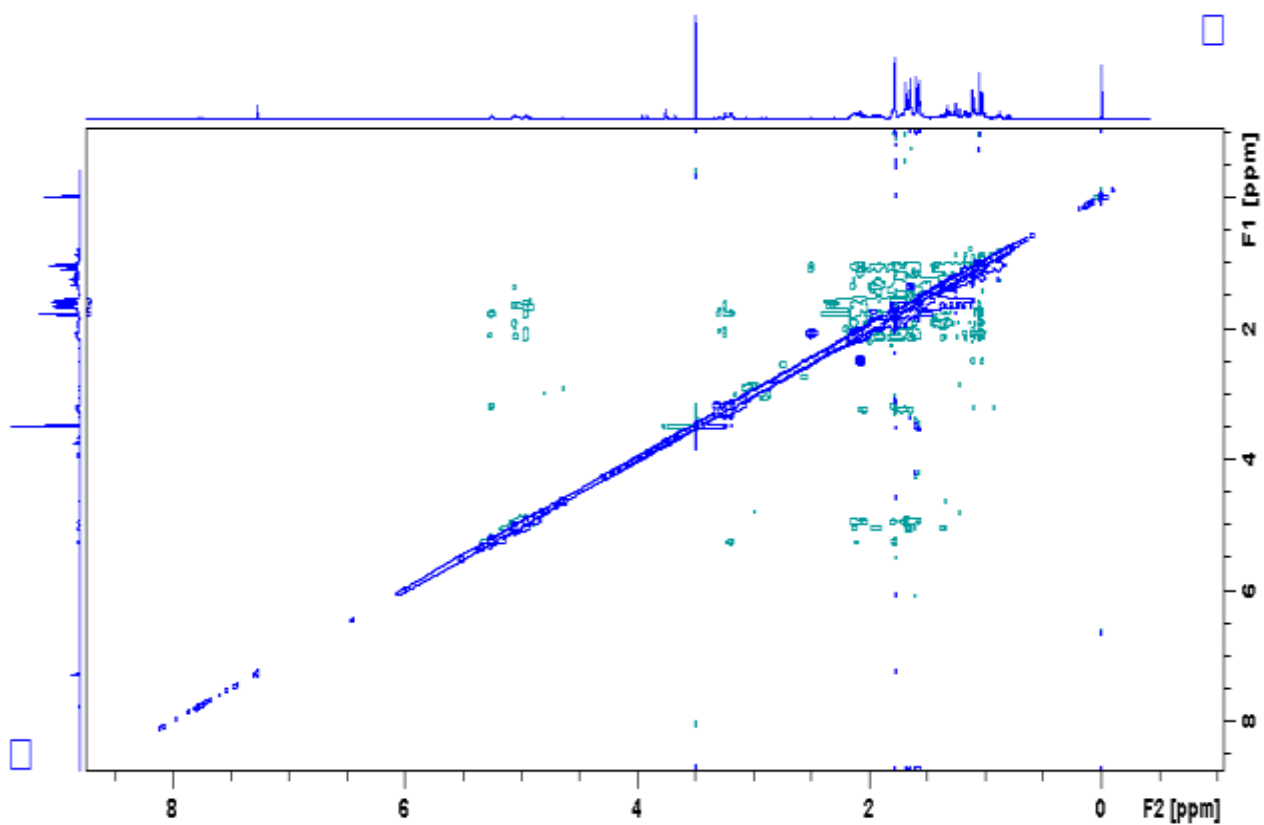

Figure S40. NOESY experiment of compound 5.

**Table S1.** Absorbance at 550 nm of the MRSA biofilm died with Hucker crystal violet after exposure to the tested compounds.

| Hyperpolyphyllirin/hyperibine J (3) |            |       |       |       |                   |
|-------------------------------------|------------|-------|-------|-------|-------------------|
| Concentration<br>[mg/L]             | Absorbance |       |       |       | SD <sup>1</sup> % |
| 0                                   | 0.672      | 0.786 | 0.802 | 0.671 | 11                |
| 0.125                               | 0.347      | 0.336 |       |       | 1                 |
| 0.25                                | 0.376      | 0.403 |       |       | 3                 |
| 0.5                                 | 0.276      | 0.394 |       |       | 13                |
| 1                                   | 0.249      | 0.184 |       |       | 7                 |
| 2                                   | 0.444      | 0.353 |       |       | 10                |
| 4                                   | 0.110      | 0.099 |       |       | 1                 |
| Olympiforin A (4)                   |            |       |       |       |                   |
| Concentration<br>[mg/L]             | Absorbance |       |       |       | SD %              |
| 0                                   | 0.541      | 0.563 | 0.537 | 0.555 | 2                 |
| 0.78                                | 0.324      | 0.229 | 0.230 |       | 11                |
| 1.56                                | 0.248      | 0.194 | 0.193 |       | 6                 |
| 3.13                                | 0.264      | 0.195 | 0.139 |       | 12                |
| 6.25                                | 0.184      | 0.121 | 0.092 |       | 9                 |
| 12.5                                | 0.152      | 0.150 | 0.072 |       | 8                 |
| Olympiforin B (5)                   |            |       |       |       |                   |
| Concentration<br>[mg/L]             | Absorbance |       |       |       | SD %              |
| 0                                   | 2.066      | 2.116 | 2.050 | 2.218 | 4                 |
| 0.063                               | 0.978      | 1.044 |       |       | 2                 |
| 0.125                               | 0.926      | 0.790 |       |       | 5                 |
| 0.25                                | 0.592      | 0.502 |       |       | 3                 |
| 0.5                                 | 0.534      | 0.342 |       |       | 7                 |
| 1                                   | 0.406      | 0.332 |       |       | 2                 |

<sup>1</sup> Standard deviation.

**Table S2.** One-way ANOVA of the metabolic activity of the tested strains after exposure to hyperpolyphyllirin/hyperibine J (3), olympiforin A (4) and olympiforin B (5). Comparison between the treated groups and untreated control.

| Hyperpolyphyllirin/hyperibine J (3) |                                     |              |      |                  |
|-------------------------------------|-------------------------------------|--------------|------|------------------|
| Bacteria                            | Dunnett's multiple comparisons test | Significance |      | Adjusted P Value |
| <i>S. aureus</i>                    | Control vs. 100 <sup>1</sup>        | Yes          | **** | < 0.0001         |
|                                     | Control vs. 50                      | Yes          | **** | < 0.0001         |
|                                     | Control vs. 25                      | Yes          | **** | < 0.0001         |
|                                     | Control vs. 12.5                    | Yes          | **** | < 0.0001         |
|                                     | Control vs. 6.25                    | Yes          | **** | < 0.0001         |
|                                     | Control vs. 3.13                    | Yes          | **** | < 0.0001         |
|                                     | Control vs. 1.56                    | Yes          | **** | < 0.0001         |
|                                     | Control vs. 0.78                    | No           | ns   | 0.9977           |
| MRSA                                | Control vs. 100                     | Yes          | **** | < 0.0001         |
|                                     | Control vs. 50                      | Yes          | **** | < 0.0001         |
|                                     | Control vs. 25                      | Yes          | **** | < 0.0001         |
|                                     | Control vs. 12.5                    | Yes          | **** | < 0.0001         |
|                                     | Control vs. 6.25                    | Yes          | **** | < 0.0001         |
|                                     | Control vs. 3.13                    | Yes          | **** | < 0.0001         |
|                                     | Control vs. 1.56                    | Yes          | **** | < 0.0001         |
|                                     | Control vs. 0.78                    | Yes          | **   | 0.0050           |
| <i>E. faecalis</i>                  | Control vs. 100                     | Yes          | **** | < 0.0001         |
|                                     | Control vs. 50                      | Yes          | **** | < 0.0001         |
|                                     | Control vs. 25                      | Yes          | **** | < 0.0001         |
|                                     | Control vs. 12.5                    | Yes          | **** | < 0.0001         |
|                                     | Control vs. 6.25                    | No           | ns   | 0.8631           |
|                                     | Control vs. 3.13                    | No           | ns   | 0.9996           |
|                                     | Control vs. 1.56                    | No           | ns   | 0.9394           |
|                                     | Control vs. 0.78                    | No           | ns   | > 0.9999         |
| <i>S. pyogenes</i>                  | Control vs. 100                     | Yes          | **** | < 0.0001         |
|                                     | Control vs. 50                      | Yes          | **** | < 0.0001         |
|                                     | Control vs. 25                      | Yes          | **** | < 0.0001         |
|                                     | Control vs. 12.5                    | Yes          | **** | < 0.0001         |
|                                     | Control vs. 6.25                    | Yes          | **** | < 0.0001         |
|                                     | Control vs. 3.13                    | Yes          | **** | < 0.0001         |
|                                     | Control vs. 1.56                    | Yes          | ***  | 0.0002           |
|                                     | Control vs. 0.78                    | No           | ns   | 0.7709           |
| Olympiforin A (4)                   |                                     |              |      |                  |
| Bacteria                            | Dunnett's multiple comparisons test | Significance |      | Adjusted P Value |
| <i>S. aureus</i>                    | Control vs. 100                     | Yes          | **** | < 0.0001         |
|                                     | Control vs. 50                      | Yes          | **** | < 0.0001         |
|                                     | Control vs. 25                      | Yes          | **** | < 0.0001         |
|                                     | Control vs. 12.5                    | Yes          | **** | < 0.0001         |
|                                     | Control vs. 6.25                    | Yes          | **** | < 0.0001         |
|                                     | Control vs. 3.13                    | Yes          | **** | < 0.0001         |
|                                     | Control vs. 1.56                    | Yes          | **** | < 0.0001         |
|                                     | Control vs. 0.78                    | Yes          | **** | < 0.0001         |
|                                     | Control vs. 0.39                    | Yes          | **** | < 0.0001         |
|                                     | Control vs. 0.20                    | Yes          | *    | 0.0353           |
| MRSA                                | Control vs. 100                     | Yes          | **** | < 0.0001         |
|                                     | Control vs. 50                      | Yes          | **** | < 0.0001         |
|                                     | Control vs. 25                      | Yes          | **** | < 0.0001         |
|                                     | Control vs. 12.5                    | Yes          | **** | < 0.0001         |
|                                     | Control vs. 6.25                    | Yes          | ***  | 0.0003           |
|                                     | Control vs. 3.13                    | Yes          | ***  | 0.0003           |
|                                     | Control vs. 1.56                    | Yes          | ***  | 0.0003           |
|                                     | Control vs. 0.78                    | Yes          | ***  | 0.0007           |
|                                     | Control vs. 0.39                    | Yes          | *    | 0.0167           |
|                                     | Control vs. 0.20                    | Yes          | *    | 0.0107           |
| <i>E. faecalis</i>                  | Control vs. 100                     | Yes          | **** | < 0.0001         |
|                                     | Control vs. 50                      | Yes          | **** | < 0.0001         |
|                                     | Control vs. 25                      | Yes          | **** | < 0.0001         |
|                                     | Control vs. 12.5                    | Yes          | **** | < 0.0001         |

|                          | Control vs. 6.25                           | No                  | ns   | 0.9994                  |
|--------------------------|--------------------------------------------|---------------------|------|-------------------------|
|                          | Control vs. 3.13                           | No                  | ns   | 0.6106                  |
|                          | Control vs. 1.56                           | No                  | ns   | 0.8262                  |
|                          | Control vs. 0.78                           | No                  | ns   | 0.9996                  |
|                          | Control vs. 0.39                           | No                  | ns   | 0.9998                  |
|                          | Control vs. 0.20                           | No                  | ns   | 0.9558                  |
| <i>S. pyogenes</i>       | Control vs. 100                            | Yes                 | **** | < 0.0001                |
|                          | Control vs. 50                             | Yes                 | **** | < 0.0001                |
|                          | Control vs. 25                             | Yes                 | **** | < 0.0001                |
|                          | Control vs. 12.5                           | Yes                 | **** | < 0.0001                |
|                          | Control vs. 6.25                           | Yes                 | **** | < 0.0001                |
|                          | Control vs. 3.13                           | Yes                 | **** | < 0.0001                |
|                          | Control vs. 1.56                           | Yes                 | **** | < 0.0001                |
|                          | Control vs. 0.78                           | Yes                 | **** | < 0.0001                |
|                          | Control vs. 0.39                           | Yes                 | **** | < 0.0001                |
|                          | Control vs. 0.20                           | Yes                 | **** | < 0.0001                |
| <b>Olympiforin B (5)</b> |                                            |                     |      |                         |
| <b>Bacteria</b>          | <b>Dunnett's multiple comparisons test</b> | <b>Significance</b> |      | <b>Adjusted P Value</b> |
| <i>S. aureus</i>         | Control vs. 100                            | Yes                 | **** | < 0.0001                |
|                          | Control vs. 50                             | Yes                 | **** | < 0.0001                |
|                          | Control vs. 25                             | Yes                 | **** | < 0.0001                |
|                          | Control vs. 12.5                           | Yes                 | **** | < 0.0001                |
|                          | Control vs. 6.25                           | Yes                 | **** | < 0.0001                |
|                          | Control vs. 3.13                           | Yes                 | **** | < 0.0001                |
|                          | Control vs. 1.56                           | Yes                 | **** | < 0.0001                |
|                          | Control vs. 0.78                           | Yes                 | **** | < 0.0001                |
|                          | Control vs. 0.39                           | Yes                 | **** | < 0.0001                |
|                          | Control vs. 0.20                           | Yes                 | ***  | 0.0008                  |
| MRSA                     | Control vs. 100                            | Yes                 | **** | < 0.0001                |
|                          | Control vs. 50                             | Yes                 | **** | < 0.0001                |
|                          | Control vs. 25                             | Yes                 | **** | < 0.0001                |
|                          | Control vs. 12.5                           | Yes                 | **** | < 0.0001                |
|                          | Control vs. 6.25                           | Yes                 | **** | < 0.0001                |
|                          | Control vs. 3.13                           | Yes                 | **** | < 0.0001                |
|                          | Control vs. 1.56                           | Yes                 | **** | < 0.0001                |
|                          | Control vs. 0.78                           | Yes                 | **** | < 0.0001                |
|                          | Control vs. 0.39                           | Yes                 | **** | < 0.0001                |
| <i>E. faecalis</i>       | Control vs. 100                            | Yes                 | **** | < 0.0001                |
|                          | Control vs. 50                             | Yes                 | **** | < 0.0001                |
|                          | Control vs. 25                             | Yes                 | **** | < 0.0001                |
|                          | Control vs. 12.5                           | Yes                 | **** | < 0.0001                |
|                          | Control vs. 6.25                           | Yes                 | ***  | 0.0005                  |
|                          | Control vs. 3.13                           | Yes                 | *    | 0.0129                  |
|                          | Control vs. 1.56                           | No                  | ns   | 0.9997                  |
|                          | Control vs. 0.78                           | No                  | ns   | 0.6447                  |
| <i>S. pyogenes</i>       | Control vs. 50                             | Yes                 | **** | < 0.0001                |
|                          | Control vs. 25                             | Yes                 | **** | < 0.0001                |
|                          | Control vs. 12.5                           | Yes                 | **** | < 0.0001                |
|                          | Control vs. 6.25                           | Yes                 | **** | < 0.0001                |
|                          | Control vs. 3.13                           | Yes                 | **** | < 0.0001                |
|                          | Control vs. 1.56                           | Yes                 | **** | < 0.0001                |
|                          | Control vs. 0.78                           | Yes                 | **** | < 0.0001                |
|                          | Control vs. 0.39                           | Yes                 | ***  | 0.0008                  |

<sup>1</sup> Concentration unit of all extracts is [mg/L]; ns – not significant.
